# Supplementary material for: Involvement of Phosphatidylserine and Triacylglycerol in the Response of Sweet Potato Leaves to Salt Stress
Source: Front Plant Sci. 2019 Sep 10;10:1086. doi: 10.3389/fpls.2019.01086 (PMC6746921; doi:10.3389/fpls.2019.01086)
Supplement: Supplementary file 1 [file Table_1.xlsx]

## Sheet: Supplementary Table 1
Supplementary Table 1 Origianl data of leaf lipidome.X22-L-CK: leaf samples collected from the control Xu 22; X22-L-S:leaf samples collected from the NaCl-stressed Xu 22;X32-L-CK, leaf samples collected from the control Xu 32; X32-L-S, leaf samples collected the NaCl-stressed Xu 32;
X22-L-CK1	X22-L-CK2	X22-L-CK3	X22-L-CK4	X22-L-S1	X22-L-S2	X22-L-S3	X22-L-S4	X32-L-CK1	X32-L-CK2	X32-L-CK3	X32-L-CK4	X32-L-S1	X32-L-S2	X32-L-S3	X32-L-S4	Accepted.Description
33.6034	38.7397	22.5287	6.14945	54.6705	76.1842	24.8306	5.31711	48.155	58.3567	9.22125	39.1289	34.1365	40.4448	30.4543	20.9872	PA(12:0/20:5(5Z,8Z,11Z,14Z,17Z))
111.795	215.459	77.0939	73.2935	28.1878	203.529	44.5655	157.365	0	0	7.34386	118.883	64.7486	0	45.8088	1.49725	PA(13:0/12:0)
369.929	449.65	453.83	365.193	311.74	258.303	225.808	292.993	337.998	287.329	363.593	371.338	80.3495	117.881	124.109	136.154	PA(13:0/18:2(9Z,12Z))
0	0	0	0	0	0	0	0	0	0	0	0	520.235	172.425	299.564	937.001	PA(14:1(9Z)/15:1(9Z))
0	2993.44	0	0	0	0	0	0	0	0	0	0	0	0	0	0	PA(17:0/19:1(9Z))
117.492	111.53	62.1758	0	196.185	44.4521	29.6988	252.802	0	0	0	0	89.9484	63.9011	49.8868	54.695	PA(17:2(9Z,12Z)/15:1(9Z))
4234.08	0	4111.73	3328.92	2573.75	1948.04	1636.8	2220.37	4892.08	2530.88	4146.32	4985.94	935.686	1309.67	782.29	823.51	PA(18:1(9Z)/22:4(7Z,10Z,13Z,16Z))
791.329	442.48	478.955	456.246	264.936	206.251	91.929	268.728	961.317	612.764	494.892	811.511	1046.68	944.522	713.784	859.739	PA(18:3(9Z,12Z,15Z)/12:0)
30025.7	50951.9	59085.5	34508.4	24928.4	16857.6	12137.9	16015.3	2320.18	521.642	3309.15	1607.22	539.125	377.39	307.109	165.269	PA(18:3(9Z,12Z,15Z)/22:1(11Z))
1.0387	0	2.84554	0	0	0	0	0	1274.68	491.55	11.5177	1196.14	1571.14	242.752	29.9955	158.586	PA(20:0/20:5(5Z,8Z,11Z,14Z,17Z))
46280.3	52555.2	57526.9	51091.1	35021.5	27127.6	18423	33033.2	6140.4	791.354	1202.68	1125.32	1134.13	450.661	208.161	918.606	PA(20:1(11Z)/18:4(6Z,9Z,12Z,15Z))
21.264	33.1433	104.828	14.134	133.868	40.3061	52.6301	355.164	45041.4	19232.8	6607.81	69958.5	2852.65	275.364	335.81	7085.09	PA(20:3(8Z,11Z,14Z)/22:2(13Z,16Z))
0.602677	4.83659	1.44692	0	3.27137	0	55.3937	21.2523	33786.2	19323.7	376.605	54341	2703.97	4069.28	9966.05	10206.2	PA(20:4(5Z,8Z,11Z,14Z)/22:2(13Z,16Z))
0.196899	5.20792	6.25261	1.71011	0.0600973	10.3681	17.9584	8.64373	16.0307	78.7633	51.8959	27.6918	115.78	400.659	279.077	332.164	PA(21:0/19:1(9Z))
0	0	425.571	197.983	163.72	130.983	94.9021	93.2468	106.892	156.246	261.388	45.0203	0	0	0	0	PA(21:0/22:2(13Z,16Z))
0	0	0	0	75.7315	246.42	205.073	157.382	399.364	1108.01	1021.45	1388.16	12956.4	13657	9319.71	15700.4	PA(22:0/21:0)
5136.54	5191.54	5380.41	5936.65	5670.51	6488.84	4789.95	7970.82	9538.91	6264.8	9062.1	12329.6	6860.58	9536.78	8362.06	9595.75	PA(22:0/22:1(11Z))
462.44	656.71	599.162	588.364	531.4	527.004	451.271	521.77	588.436	307.104	469.869	659.035	618.935	556.801	280.469	498.754	PA(22:0/22:2(13Z,16Z))
0	2.02488	5.3296	0	0	7.89935	0	0	0	0	0	0	8.73862	0	3.24416	1.70819	PA(22:1(11Z)/20:0)
52.408	35.7601	58.6371	19.1293	31.8726	55.8743	21.1781	4.76907	45.2315	82.8378	52.4717	52.4579	76.664	162.761	53.2791	43.7271	PA(22:2(13Z,16Z)/12:0)
0	0	0	0	0	0	0	0	4.96689	22.3484	0	268.09	2282.44	2268.73	2926.73	3491.65	PA(22:2(13Z,16Z)/14:0)
246.137	288.668	583.967	390.52	803.913	488.679	669.113	1771.36	40467.9	27611.6	758.231	59587.5	3674.6	1.93531	24.994	5704.31	PA(22:2(13Z,16Z)/18:2(9Z,12Z))
0	0	0	0	0	0	10.1177	0	1272.29	1204.63	0	1689.39	322.568	146.949	317.311	266.197	PA(22:4(7Z,10Z,13Z,16Z)/18:0)
56372.2	75442.8	76164.7	56052	56664.6	38674.9	30174.3	74185.4	1744.73	1104.27		391.894	1156.35	151.525	651.552	438.704	PA(22:4(7Z,10Z,13Z,16Z)/20:2(11Z,14Z))
34.4896	85.2103	92.1082	34.9629	151.91	227.15	152.367	112.915	3.25834	37.951	7.42867	4.70892	34.2558	3.7307	5.05651	4.4702	PA(22:6(4Z,7Z,10Z,13Z,16Z,19Z)/12:0)
335.859	347.708	528.744	218.635	253.171	175.307	176.121	161.232	51.1843	76.3272	158.292	43.925	1.60779	0	3.87983	6.48528	PA(22:6(4Z,7Z,10Z,13Z,16Z,19Z)/18:1(9Z))
1423.64	1405.25	1647.51	1018.65	1048.97	887.366	809.54	1089.88	1511.65	1144.16	1688.01	1657.74	487.051	378.426	687.275	731.784	PA(22:6(4Z,7Z,10Z,13Z,16Z,19Z)/20:1(11Z))
481.689	557.438	716.649	587.889	295.714	255.334	170.526	217.911	176.636	306.513	734.75	387.173	28.8128	7.27685	90.1371	52.6129	PA(22:6(4Z,7Z,10Z,13Z,16Z,19Z)/20:2(11Z,14Z))
248.454	297.829	1772.15	1002.94	1370.41	1093.37	1142.62	1550.53	1277.29	1528.29	1459.74	1705.83	626.563	1223.24	1076.62	1029.06	PA(18:2(9Z,12Z)/22:6(4Z,7Z,10Z,13Z,16Z,19Z))
292.427	346.681	211.406	207.573	200.378	213.098	185.507	166.364	37.0662	69.8632	81.7245	28.5518	62.9105	81.3304	84.9717	146.941	PA(14:1(9Z)/14:1(9Z))
31.6212	40.9224	58.7034	7.32009	37.054	83.2277	36.3697	7.88864	56.658	119.476	6.94678	20.662	77.8582	1.68039	2.37153	174.32	PA(13:0/19:0)
4117.94	4728.57	5958.14	3248.36	5024.99	7373.58	5020.35	2385.06	4091.85	5137.44	10189.5	6876.59	3461.25	9272.37	5310.17	5554.56	PA(18:3(9Z,12Z,15Z)/16:0)
0	0	0	0	0	0	0	0	0	0.195689	0	0	0.182677	0	0	0	PA(O-16:0/14:1(9Z))
0	0	0	0	0	0	0	0	205.491	99.0049	118.112	91.3507	55.9468	285.65	144.523	216.939	PA(O-18:0/14:0)
0	0	1.87479	0	0	0	0	0	0	0	0	0	28.1693	5.43577	56.9482	84.994	PA(O-20:0/17:2(9Z,12Z))
840.959	859.64	857.558	351.492	46.0433	97.5629	39.6085	18.0623	62.6868	115.186	174.16	165.029	150.599	327.385	8.06614	33.4656	PA(O-20:0/18:4(6Z,9Z,12Z,15Z))
0	0	69.8675	28.5326	39.9419	28.5303	20.1618	42.9306	4.50971	24.3885	28.6614	37.5004	37.1356	50.3779	41.799	69.0746	PA(P-16:0/12:0)
0	0	541.078	336.14	441.52	434.041	449.879	460.854	444.922	550.396	562.185	687.942	510.847	1053	595.015	812.26	PA(P-16:0/13:0)
0	0	1.7052	0	0	0	0	0	14.5685	48.5597	44.229	150.354	4921.47	1336.49	3.96494	415.667	PA(P-18:0/21:0)
0	0	0	0	0	0	0	0	0	0	0	0	1.56123	387.031	64.7547	34.3233	PA(P-20:0/19:0)
0	0	0	0	0	0	3.42148	0	437.253	297.237	0	436.53	167.61	45.8526	109.796	113.379	PA(10:0/10:0)
806.342	855.716	2086.53	453.771	2066.29	1163.86	1091.07	806.777	36.8197	5.68894	304.131	52.1242	24.5594	0.132825	10.9817	9.96036	PA(16:0/22:6(4Z,7Z,10Z,13Z,16Z,19Z))
340.426	0	177.156	0	160.077	184.31	104.044	50.0983	2797.34	889.333	1883.85	1861.38	1848.97	0.18536	394.394	942.166	LPA(0:0/18:0)
90.365	53.6898	33.8043	116.144	35.0183	34.0839	11.5368	29.114	1013.16	142.22	297.885	309.84	3125.74	900.639	441.965	283.207	PA(21:0/0:0)
532.44	594.896	652.054	556.138	476.495	406.716	328.985	347.147	553.61	344.656	581.801	597.577	26.0963	15.3451	117.885	139.404	PA(18:4(6Z,9Z,12Z,15Z)/0:0)
16.6693	143.148	4.72804	2.37044	0	0	3.75287	0	48.3774	2.26185	0	0	43.6797	0	2.10319	2.37985	PA(20:5(5Z,8Z,11Z,14Z,17Z)/0:0)
0	0	0	0.620112	0	0	0	0	5246.64	2055.39	28.5381	3726.66	230.927	0	0	96.7577	PA(17:0/0:0)
9.52582	42.5298	5863.85	3863.63	3861.22	3307.69	2869.67	3482.82	5021.9	2186.25	5163.9	7786.77	1497.62	5512.19	2019.41	2199.36	PA(P-16:0/0:0)
183.01	0	24.9203	0	150.788	63.9269	47.4837	154.611	115.399	45.0764	4.43705	47.5188	85.4376	0	2.12029	4.91661	PA(13:0/0:0)
2.13154	0.505766	2.64483	0.808885	1.06638	0.183745	0.409938	0.720056	17.1106	5.67939	2.77176	0	17.141	2.46513	0	20.905	PE(17:0/20:5(5Z,8Z,11Z,14Z,17Z))
12.5059	19.6219	19.4104	9.6582	17.0593	25.2346	12.9812	6.53091	35.3993	261.026	9.87971	35.3611	221.116	18.2231	50.5966	426.983	PE(18:0/15:0)
0	0	79.9895	15.617	80.0513	74.3243	69.0223	70.5268	5.02495	0	3.19177	7.31063	2.83044	7.09183	3.07841	5.61313	PE(18:4(6Z,9Z,12Z,15Z)/20:5(5Z,8Z,11Z,14Z,17Z))
126.428	0	212.833	140.268	102.311	75.7072	124.346	227.094	262.958	100.252	179.577	224.666	2742.27	1325.62	290.616	286.068	PE(19:0/20:5(5Z,8Z,11Z,14Z,17Z))
211.173	121.375	200.723	151.663	297.293	173.358	139.404	545.928	238.245	68.4396	92.2237	170.627	36.3416	2.44763	2.00707	0	PE(19:0/22:4(7Z,10Z,13Z,16Z))
56.47	40.1457	40.6769	23.8937	0	0	0	0	0	0.43869	0.380084	1.60501	4.2257	0	0	0.570601	PE(19:1(9Z)/15:0)
0	0	0	0	0	0	0	0	0	0	0	0	1.10558	325.897	275.566	12.3097	PE(20:0/19:1(9Z))
680.643	18.4654	809.669	580.908	819.934	710.055	472.053	481.697	619.948	265.805	734.447	585.274	139.713	472.536	81.4635	135.476	PE(20:2(11Z,14Z)/22:6(4Z,7Z,10Z,13Z,16Z,19Z))
175.172	292.394	266.737	188.707	72.846	46.7101	0	1.65359	0.545871	3.8437	11.216	30.625	43.6077	31.6991	29.222	70.6508	PE(20:3(8Z,11Z,14Z)/20:1(11Z))
14.8338	0	27.631	23.6942	17.3402	3.56803	2.35255	26.0737	36.0128	0	16.4019	28.1208	0	0	0	0	PE(20:5(5Z,8Z,11Z,14Z,17Z)/20:5(5Z,8Z,11Z,14Z,17Z))
2.68573	0	16.1904	11.5079	8.72145	14.4759	17.8536	67.8533	0	0	0	0	537.882	150.664	12.5847	0	PE(21:0/20:5(5Z,8Z,11Z,14Z,17Z))
7330.56	8983.34	12924.6	16642	7524.02	5145.05	5063.26	13511.1	35.9004	0	24.171	30.6456	50.3479	414.148	52.6952	276.381	PE(22:0/20:5(5Z,8Z,11Z,14Z,17Z))
20.6242	33.4117	53.1647	0.514276	143.782	184.907	197.37	86.9177	13.9398	216.035	62.5399	21.5638	90.9616	137.624	168.225	200.13	PE(22:0/22:2(13Z,16Z))
0	4.81812	8.2087	3.85448	335.415	295.457	361.325	1152.1	0	0	2.18032	28.9569	520.217	41.2406	243.259	123.979	PE(22:0/22:6(4Z,7Z,10Z,13Z,16Z,19Z))
420.006	413.451	382.957	325.895	325.435	250.667	228.993	210.097	140.638	6.21131	47.2411	1.99045	13.2077	45.135	65.8905	58.159	PE(22:1(11Z)/22:4(7Z,10Z,13Z,16Z))
13.8876	28.6427	41.7801	13.9074	12.6845	5.94438	4.05711	12.9864	22.2183	11.0206	0	35.7724	2436.14	66.4204	0	56.2016	PE(22:1(11Z)/22:6(4Z,7Z,10Z,13Z,16Z,19Z))
63.9417	93.9498	239.99	115.854	157.297	68.9002	68.7041	275.832	495.593	397.305	965.557	524.296	209.703	129.022	1.91794	101.951	PE(22:2(13Z,16Z)/22:6(4Z,7Z,10Z,13Z,16Z,19Z))
0	0	0	0	0	0	0	0	401.181	207.484	1.48485	69.2276	36.7712	0	17.6273	29.9332	PE(22:4(7Z,10Z,13Z,16Z)/22:2(13Z,16Z))
40.6669	82.0343	137.293	14.4573	60.8503	18.4809	21.839	106.021	0	2.28769	241.971	0	105.44	10.7702	20.7856	0	PE(22:6(4Z,7Z,10Z,13Z,16Z,19Z)/18:1(9Z))
1.78407	0	0	7.06321	14.2325	1.70205	3.54344	187.95	135.916	62.998	0	6.27575	226.106	9.32105	0	0.917856	PE(22:6(4Z,7Z,10Z,13Z,16Z,19Z)/18:3(6Z,9Z,12Z))
1726.37	3.45189	9.12231	7.99627	0	0	17.0959	6.23611	0	0	0	0	0	0	0	0	PE(22:6(4Z,7Z,10Z,13Z,16Z,19Z)/20:3(8Z,11Z,14Z))
3.64045	0	0	0	0	0	0	0	25.075	0	3.38991	0	550.742	166.398	7.4651	8.51681	PE(22:6(4Z,7Z,10Z,13Z,16Z,19Z)/21:0)
0	190.758	1.55553	143.908	150.903	103.471	0	0	0	0	0	0	0	0	0	0	PE(18:0/16:0)
228.287	0	202.293	138.685	124.837	128.07	60.2112	158.133	86.3918	38.2696	76.929	79.3613	88.1888	149.341	61.8044	59.8427	PE(17:0/22:6(4Z,7Z,10Z,13Z,16Z,19Z))
747.115	188.888	278.894	426.325	538.204	551.302	353.149	779.314	1083.79	818.083	232.417	589.199	731.835	126	166.372	107.437	PE(14:0/22:6(4Z,7Z,10Z,13Z,16Z,19Z))
1.70951	0	1.90532	0	0	0	1.04053	0	0	11.5315	0	0	13.3946	21.0809	25.8706	61.4921	PE(14:0/16:1(9Z))
6.77522	6.57339	6.05501	7.1278	2.72251	6.47701	1.45656	9.71091	0	74.7675	3.04193	0	82.1115	133.397	135.704	241.241	PE(O-16:0/12:0)
127.968	106.629	93.1636	233.009	171.649	73.1621	61.9159	240.174	417.275	174.693	119.442	178.01	257.314	19.6275	3.28635	11.4079	PE(O-16:0/18:4(6Z,9Z,12Z,15Z))
4088.26	4595.69	7276.15	7849.72	4020.29	2670.14	2856.82	6309.5	11683.3	3368.91	8578.77	9814.24	2243.31	2814.96	1705.13	1887.77	PE(O-18:0/14:0)
156.51	175.381	574.512	324.357	463.938	139.273	57.0411	110.804	81.2407	57.7613	1111.27	437.718	2.21015	728.306	607.601	61.3466	PE(O-18:0/17:0)
2852.43	3036.17	4716.08	2384.69	4596.88	5351.96	5589.55	3455.6	2089.71	3146.7	2470.15	1040.59	2775.41	1797.27	1906.51	2527.25	PE(O-18:0/18:2(9Z,12Z))
0	0	0	0	0	0	0	0	0	0	0	0	0.0972039	0	5.04516	0.262381	PE(O-20:0/19:0)
0	0	1.6032	6.86962	1024.91	2027.17	1554.1	1431.49	0	0	0	0	79.1228	60.9888	157.556	268.931	PE(O-20:0/20:3(8Z,11Z,14Z))
0.986018	25.0232	4.677	6.22772	372.055	393.348	517.085	1011.53	111.642	39.8481	2.07394	0	310.156	0	19.7986	0	PE(O-20:0/20:5(5Z,8Z,11Z,14Z,17Z))
925.529	1124.81	1005.24	1313.57	1003.76	1026.99	982.77	891.794	982.909	547.527	796.959	1401.41	174.549	144.44	486.259	529.815	PE(O-20:0/22:4(7Z,10Z,13Z,16Z))
175.337	158.311	130.308	69.7516	92.6097	101.672	67.7947	97.7171	214.992	201.361	337.632	191.983	418.369	607.617	394.761	493.576	PE(O-20:0/22:6(4Z,7Z,10Z,13Z,16Z,19Z))
91.6804	131.151	113.022	167.862	204.598	600.345	638.2	249.963	168.435	186.029	204.571	185.058	136.104	316.217	305.411	573.313	PE(P-16:0/20:0)
1417.26	0	1121.33	1086.24	858.041	910.245	762.766	934.882	1228.42	782.013	1107.38	1386.78	968.823	1838.13	834.877	1104.51	PE(P-18:0/17:2(9Z,12Z))
5.2744	0	5.93378	1.59714	0	0	1.41401	2.8471	1181.24	192.04	533.95	636.212	4231.81	991.416	2.12095	487.159	PE(P-18:0/22:4(7Z,10Z,13Z,16Z))
3117.3	3278.93	4273.93	2701.39	3454.67	4926.89	4343.18	3416.71	3292.15	3625.31	4315.92	3082.34	2570.8	3600.44	3561.95	5751.61	PE(P-20:0/16:1(9Z))
0	0	0	0	0	0	0	0	0	0	0	0	215.802	0	0	0	PE(P-20:0/17:2(9Z,12Z))
41.4598	35.6091	68.6059	78.9541	27.8177	13.8127	18.6387	36.5368	111.676	33.9728	51.6491	29.9312	29.2062	16.7179	22.3665	11.8875	PE(P-20:0/22:2(13Z,16Z))
1052.67	722.052	932.573	606.055	561.587	691.796	483.417	275.82	7258.74	4180.8	1018.1	8033.6	1679.58	3467.85	2233.84	2036.05	PE(16:0/16:0)
196.773	774.837	415.931	246.749	567.972	650.808	510.614	717.734	106.551	104.573	325.688	250.618	168.116	420.487	103.322	240.642	PE(18:0/22:6(4Z,7Z,10Z,13Z,16Z,19Z))
620.325	0	538.724	393.761	416.066	431.234	261.828	490.898	547.9	339.156	414.661	506.113	391.95	662.659	439.948	502.465	PE(21:0/22:6(4Z,7Z,10Z,13Z,16Z,19Z))
8.78903	24.5235	15.1414	9.09162	85.6901	94.9891	91.2787	70.1249	0.0496146	2.72664	58.8984	0	22.6525	0	10.2037	0	LysoPE(0:0/14:0)
164.161	74.7771	141.655	97.4185	16.4636	16.4313	7.24585	51.7814	39.097	35.496	0	0	0	0	0	0.00689101	LysoPE(0:0/15:0)
35.5807	5.84179	23.6772	8.74985	70.2407	11.1699	25.0089	95.0394	0.977065	1.06775	211.969	0	36.7188	0.713112	6.25099	0.66645	LysoPE(0:0/16:1(9Z))
0	0	0	0	4.4046	0	0	0	2.9141	1.49033	1.17659	0	17.9185	7.39343	3.11708	16.7973	LysoPE(0:0/18:1(9Z))
68.517	0	59.9197	0	34.4467	27.1883	29.6761	18.5188	248.995	95.7001	195.756	144.497	309.719	18.9131	34.0901	217.992	LysoPE(0:0/18:2(9Z,12Z))
16.5722	0	17.091	0	0	0	0	0	173.576	4.19956	49.5947	43.6282	0	4.52292	0	4.79308	LysoPE(0:0/20:2(11Z,14Z))
1.1579	0	0	0	2.26587	30.1016	76.6018	6.41287	0	64.4616	1.85449	0	664.086	731.501	767.06	1286.41	LysoPE(0:0/24:1(15Z))
27.0795	52.7637	25.8	29.9583	30.9016	38.9667	78.4528	53.3846	0	112.943	35.4175	0.0161398	105.655	0.406409	79.6221	38.0645	LysoPE(20:4(8Z,11Z,14Z,17Z)/0:0)
0	22.5467	0	0	1207.37	1463.8	1366.06	1702.34	0	0	0	0	0	0	0	0	PE(16:1(9Z)/0:0)
165.139	205.322	164.547	191.281	312.981	215.804	458.948	221.79	1531.95	707.18	886.015	998.245	1084.01	701.984	448.613	515.923	PE(21:0/0:0)
5.3542	0	19.8086	0	22.6373	52.8752	13.3304	20.5933	98.4606	108.134	123.99	76.4253	127.372	0	293.657	342.169	PE(18:3(9Z,12Z,15Z)/0:0)
0.0238576	3.60731	2.41185	0	2.11419	5.52457	1.81927	3.1681	0	6.9501	0.116548	0	10.9334	1.97378	5.53446	8.75472	PC(13:0/20:4(5Z,8Z,11Z,14Z))
0	53.838	27.0687	5.76454	36.8551	18.6195	20.4168	19.1815	37.2187	53.975	19.8796	17.3049	31.7756	157.751	77.263	62.0684	PC(17:2(9Z,12Z)/16:0)
474.402	626.43	492.715	535.085	2.79458	0	0	0	0	0	0	0	1.24995	163.442	117.544	132.775	PC(17:2(9Z,12Z)/20:0)
1163.69	355.185	2090.36	1445.96	1937.56	1288.88	1876.16	3499.96	2839.5	1482.93	1785.88	2728.06	744.88	1625.7	661.633	675.633	PC(18:3(6Z,9Z,12Z)/20:5(5Z,8Z,11Z,14Z,17Z))
951.003	940.956	1582.68	602.278	497.22	338.628	527.81	473.616	56026	36663.7	2083.96	116761	4962.92	6183.2	16043.6	17943.2	PC(19:1(9Z)/16:1(9Z))
158.924	57.1953	412.989	287.114	458.364	348.321	538.575	1262.64	588.621	381.281	424.459	703.6	161.971	272.346	66.9805	101.421	PC(20:2(11Z,14Z)/18:3(6Z,9Z,12Z))
1094.47	0	1431.39	1451.59	746.668	547.313	614.308	1202.55	2126.11	446.096	1217.63	1490.63	521.042	311.346	51.8035	80.7366	PC(20:2(11Z,14Z)/20:5(5Z,8Z,11Z,14Z,17Z))
2289.18	2445.61	3259.67	1991.1	1539.28	1179.28	1039.54	1263.82	3179.2	1310.89	2073.75	2241.27	296.668	151.597	422.799	272.269	PC(20:3(8Z,11Z,14Z)/15:1(9Z))
177.476	254.87	226.528	322.633	332.208	191.242	232.248	246.351	258.165	205.911	321.833	522.228	219.91	237.769	172.362	153.974	PC(20:4(5Z,8Z,11Z,14Z)/18:4(6Z,9Z,12Z,15Z))
1708.63	2124.68	1971.02	1824.35	1540.23	1252.74	955.384	1800.36	24.469	21.1095	1717.74	29.3738	9.31753	0	59.618	0	PC(20:5(5Z,8Z,11Z,14Z,17Z)/22:2(13Z,16Z))
305.928	307.525	316.481	318.878	291.21	342.48	259.956	304.429	428.16	439.222	340.866	276.169	443.926	491.826	496.481	239.479	PC(21:0/20:0)
565.897	529.733	594.001	690.127	435.099	648.255	516.375	760.792	1938.88	825.718	1203.89	1130.41	458.387	662.382	903.027	628.319	PC(21:0/20:1(11Z))
0	0	0	0	0	0	0	0	57.024	1.4024	0	0	32.1554	0	23.9244	7.76571	PC(21:0/20:5(5Z,8Z,11Z,14Z,17Z))
1104.03	1054.04	1287.71	1407.37	526.542	701.014	540.583	879.396	1944.01	630.993	1041.58	1103.34	909.49	733.086	634.397	374.063	PC(22:0/20:5(5Z,8Z,11Z,14Z,17Z))
0	0	0	0	0	0	0	0	0	0	0	0	105.902	69.0852	0	3503.11	PC(22:0/22:6(4Z,7Z,10Z,13Z,16Z,19Z))
1757.32	1855.3	1282.55	1103.87	1138.01	1136.18	956.719	1171.11	2215.21	1777.61	2362.43	2433.5	2033.62	3901.36	2136.37	2592.39	PC(22:1(11Z)/20:5(5Z,8Z,11Z,14Z,17Z))
317.442	1498.61	1173.44	931.16	145.381	120.753	0	0	0	0	0	0	0	0	0	0	PC(22:1(11Z)/22:2(13Z,16Z))
79.3722	9.68548	0	77.8299	148.225	47.5435	2.81007	200.401	170.201	16.9674	0	13.1147	192.306	0	0	0.929728	PC(22:6(4Z,7Z,10Z,13Z,16Z,19Z)/17:0)
0	0	0	0	0	0	0	0	0	0	786.503	2.22852	0	13.3277	0	0	PC(22:6(4Z,7Z,10Z,13Z,16Z,19Z)/22:1(11Z))
3.45992	9.39002	5.8229	0	2.59864	22.2023	4.39919	5.49836	4.0949	22.5723	30.9067	20.2525	15.4908	31.3765	32.635	26.1895	PC(22:6(4Z,7Z,10Z,13Z,16Z,19Z)/22:2(13Z,16Z))
52.1063	64.0568	133.039	17.7818	163.69	159.762	149.22	99.0117	1.2291	119.461	88.8585	10.9212	95.2734	52.5552	101.615	158.77	PC(O-16:0/12:0)
0	0	0	0	0	0	1.29347	0	0	58.7908	22.6372	3.81055	4868.92	67.8234	6.17984	20.7978	PC(O-18:0/20:2(11Z,14Z))
8.54871	18.4431	6.89189	9.54551	0	0	0	0	0	33.9376	69.7186	935.229	1.72551	0	2.66203	26.8557	PC(O-20:0/15:0)
1.88942	10.1893	4.83977	3.40017	0.264665	0.784717	0	0	849.958	410.108	0	1053.29	94.4461	116.956	221.533	310.409	PC(O-20:0/18:3(9Z,12Z,15Z))
0	0	1.9307	0	0	0	0	0	0	0	2.80468	0	3611.35	1279.06	0	205.683	PC(O-20:0/22:4(7Z,10Z,13Z,16Z))
58.0661	36.9495	72.0375	36.8451	36.6311	32.8355	36.031	43.8308	46.6473	57.7648	13.8844	81.553	78.984	69.3036	53.2305	38.0957	PC(P-18:0/22:4(7Z,10Z,13Z,16Z))
0	0	0	0	0	0	0	0	0	0	0	0	2174.05	468.586	77.3493	340.191	PC(P-20:0/22:4(7Z,10Z,13Z,16Z))
0	0	0	0	0	0	0	0	0	2.37538	3.39497	0	3947.18	0	254.176	0	PC(P-20:0/22:6(4Z,7Z,10Z,13Z,16Z,19Z))
15.1606	0	16.7268	0	18.0975	0	42.0082	4.97493	129.042	42.3126	61.8662	46.6893	20.4938	1.69141	15.6073	39.5531	PC(14:0/O-1:0)
0	0	0.000742726	0	1.68463	0.692248	2.32667	19.5487	49.263	6.09002	0	0	6.17451	0	0	0	PC(16:0/O-16:0)
0	0	0	0	0	0	0	0	5.43944	0.941433	0	0	124.782	35.6498	7.10489	0	PC(16:0/9:0(CHO))
0	0	0	0	0	0	0	0	0	0	0	0	0	0	0	0	PC(O-16:0/O-18:0)
254.822	267.94	110.135	152.596	35.1874	99.3215	70.7755	27.7029	553.45	341.76	749.764	260.047	312.178	270.505	395.455	462.26	PC(O-18:1(9Z)/O-1:0)
0	0	0	0	0	0	0	0	0	0	0	0	0	0	0	0	PC(O-18:1(9Z)/O-18:1(9Z))
29387.5	43664.3	41150.3	32869.7	18996.2	11599.8	6606.5	12245.3	336.497	110.868	1973.98	1160.8	87.2437	17.4348	192.345	115.044	PC(20:4(8Z,11Z,14Z,17Z)/16:1(9Z))
1386.76	1544.46	1631.82	1458.61	857.807	957.906	429.858	948.807	258.88	183.977	274.74	386.061	253.128	134.089	0	98.9233	PC(O-16:1(9Z)/18:2(9Z,12Z))
0	0	0	0	0	0	0	0	0	0	0	0	1773	16.637	0	0	PC(P-18:1(9Z)/22:1(13Z))
427.04	548.784	387.335	281.914	259.309	264.537	258.521	274.266	279.39	350.146	488.816	36.8891	345.345	552.255	389.439	0	PC(21:0/22:6(4Z,7Z,10Z,13Z,16Z,19Z))
73.4539	68.4431	106.24	62.7017	47.6604	88.1214	58.1068	106.822	2.98079	6.03352	5.02772	0	18.4958	0.869611	2.97514	3.81233	PC(18:0/18:0)
1673.66	2417.37	1804.25	685.492	3260.24	2820.88	0	0	281.338	2496.42	1096.2	584.14	847.019	0	0	10.4585	PC(P-18:0/22:6(4Z,7Z,10Z,13Z,16Z,19Z))
0	0	0	0	0	2.44601	59.5743	168.415	0	0	0	0	0	73.658	1316.9	0	PC(14:0/24:1(15Z))
455.185	487.753	349.28	306.604	285.315	278.342	277.334	286.304	139.916	151.202	195.647	210.27	142.265	213.877	163.244	202.946	PC(17:0/2:0)
262.048	247.459	284.5	256.549	1032.75	941.384	1384.25	914.2	404.097	818.898	502.916	342.494	659.661	1954.29	1292.55	1100.83	PC(24:1(15Z)/24:1(15Z))
177.451	138.624	223.085	49.8475	214.794	354.43	326.73	173.466	336.223	427.32	348.387	124.152	1978.79	2393.14	1779.33	2974.79	PC(36:0/16:0)
129.075	169.817	129.659	111.355	110.74	122.718	73.0815	114.389	98.3742	73.8518	114.753	119.794	11.4463	2.12999	15.5773	7.47879	PC(6:0/18:0)
90.4364	7.36676	29.009	30.2312	54.5578	21.0415	11.0254	48.1215	61.6067	39.493	0	4.83299	272.506	4.31567	0	8.37052	PC(9:0/5:0)
55.7469	0	60.6575	0	95.1905	52.2707	124.668	50.1068	352.931	139.31	197.352	290.033	670.568	0	147.608	127.847	PC(O-14:0/2:0)
0	0	0	0	3.43378	0.951589	0	0	29.441	5.09561	0	28.2088	0	12.1251	17.6292	2.90363	PC(O-15:0/2:0)
217.329	131.017	217.006	235.725	136.851	223.563	206.983	243.717	180.266	94.6165	87.5337	142.604	118.709	92.3853	85.6079	41.5128	PC(O-16:0/22:5(7Z,10Z,13Z,16Z,19Z))
0	0	0	0	0	0	0	0	0	0	0	0	0	0	0	0	PC(O-16:0/3:0)
0.0270152	2.09521	2.12853	0	23.3215	3.2299	2.07236	0	155.639	40.973	123.127	104.427	79.5959	56.3651	74.0022	89.2717	PC(O-16:0/3:1(2E))
0	0	0	0	0	0	0	0	4.6257	0	0	0	0	0	0	0	PC(O-18:0/3:0)
0	0	0	0	0	0	0	0	0	0	0	0	0	0	0	0	PC(O-20:0/2:0)
106.709	81.9879	109.175	105.476	36.5906	51.8667	31.1812	71.6571	591.54	133.192	205.064	174.536	249.671	100.722	145.785	118.559	PC(O-20:0/22:0)
0	0	0	0	0	0	0	0	50.0864	1.99194	27.7527	0	0	0	7.65275	23.9644	PC(O-16:1(11Z)/2:0)
2.10775	3.32742	6.13416	0.0149239	0.156307	11.3849	6.49979	0.669945	40.448	96.038	111.817	4.72856	182.768	211.013	163.151	257.482	LysoPC(20:3(5Z,8Z,11Z))
5.92257	67.9892	1.00971	3.5158	0	70.856	19.0628	1.73366	2.58184	0	13.6323	151.558	12.3294	1.57055	35.3986	3.61425	LysoPC(22:5(7Z,10Z,13Z,16Z,19Z))
1015.88	1001.98	967.478	1111.84	856.433	830.468	658.828	682.288	664.817	279.567	660.176	443.31	275.918	215.649	193.78	189.251	PC(22:4(7Z,10Z,13Z,16Z)/0:0)
0	0	0	0	0	0	12.8603	0	0	5.06661	0	0	3.8153	80.3245	25.253	21.2856	PC(19:1(9Z)/0:0)
0.731417	0	0	0	0	0	0	0	3.59414	0.85324	0	0	601.921	205.903	79.9027	60.5204	PC(20:3(8Z,11Z,14Z)/0:0)
14.5008	15.4337	22.3674	14.3424	9.97758	0	2.93075	0	0	0.745064	0	1.66329	2.37673	0	0	1.02274	PC(22:2(13Z,16Z)/0:0)
43.8048	39.558	62.7892	23.5332	60.9405	45.6906	108.078	107.191	0	149.422	64.4011	0	96.2296	0	53.1839	20.9012	PC(O-10:1(9E)/0:0)
431.197	439.645	430.649	481.932	720.052	471.961	841.656	476.554	2935.54	1128.6	1469.08	2145.17	4186.34	1468.1	944.82	830.236	PC(0:0/16:0)
288.592	335.166	86.5939	108.096	4.87676	36.1362	0	0	251.678	138.765	443.359	148.766	73.5675	0	0	67.4549	PC(P-18:0/0:0)
56.0856	0	44.4907	0	144.699	77.5611	180.935	71.0586	419.041	206.752	282.762	467.592	274.22	0.479397	155.478	182.454	PC(13:0/0:0)
4305.72	3380.93	1607.27	2324.34	502.642	1063.98	534.588	321.741	7441.93	5329.22	13207.9	4476.25	2469.77	2109.87	4981.36	4785.08	PC(P-19:1(12Z)/0:0)
14.6579	0	12.8729	0	40.8835	14.8203	63.3507	19.0231	192.005	6.08115	111.327	135.668	159.867	0	57.8382	58.9485	PC(18:0/0:0)
118.743	0	82.6467	0	3.74067	1.7221	17.3601	21.3199	596.515	57.7533	240.357	220.301	5.34099	16.1569	36.9956	16.4764	PC(18:2(9Z,12Z)/0:0)
1.6896	1.8844	3.45843	1.8629	1.57867	0	7.52249	0	89.9767	45.1982	61.7175	72.754	50.6207	38.0491	36.5996	26.5351	PC(20:0/0:0)
21.1626	22.1163	15.3788	14.3776	12.3916	15.027	15.8773	14.1207	25.4867	7.71829	1.35988	17.2465	2.4186	9.12201	3.06662	2.75647	PC(20:4(5Z,8Z,11Z,14Z)/0:0)
127.684	10.8989	51.7158	67.0891	83.9757	12.5043	40.8138	186.735	0	145.105	16.9304	0	74.5702	0	3.28227	1.87051	PS(12:0/20:4(5Z,8Z,11Z,14Z))
0	0	1.30962	0	1.8896	0	0	0	168.753	7.91174	10.3814	92.8925	280.272	264.041	131.696	109.533	PS(14:0/15:1(9Z))
7.76658	0	0	0	0	0	0	0	8.56406	0	0	0	88.0732	90.2972	46.9593	32.3118	PS(14:1(9Z)/12:0)
31.6254	35.9815	37.4127	34.8939	7.56007	13.8846	19.2364	35.7526	71.6178	93.7191	39.4485	55.4709	32.4033	8.55656	50.5006	13.9441	PS(15:1(9Z)/15:1(9Z))
370.92	244.267	733.426	464.54	406.295	87.0437	90.6316	75.0903	23.5181	35.3767	7394.3	3283.82	45.4978	499.371	384.335	71.878	PS(17:0/20:2(11Z,14Z))
1079.97	917.727	1513.95	1221.18	618.367	632.323	686.849	1363.8	1598.71	1242.77	822.955	1308.47	221.247	58.5583	156.639	143.351	PS(17:1(9Z)/14:1(9Z))
133.813	20.6871	73.9575	32.191	39.3255	11.9083	5.13972	26.1179	172.516	50.1299	12.7815	98.0759	0.947076	0	0	0	PS(17:2(9Z,12Z)/20:1(11Z))
2769.12	2913.08	2694.8	3076.81	622.175	110.472	0	0	0	0	0	0	0	0	0	0	PS(17:2(9Z,12Z)/20:5(5Z,8Z,11Z,14Z,17Z))
0	0	0	0	0	0	0	0	0	0	0	0	686.596	332.819	24.5407	228.308	PS(18:0/22:1(11Z))
49014.4	18220.2	259.914	172.97	340.4	223.542	362.266	1218.33	227.821	338.169	407.822	245.263	116.368	97.7463	106.975	102.142	PS(18:3(9Z,12Z,15Z)/19:0)
0	0	0	0	0	0	5.25958	0	583.133	524.445	4.91045	788.483	20.0498	25.2446	42.7619	73.6875	PS(18:4(6Z,9Z,12Z,15Z)/16:0)
15.6758	0	10.862	5.9654	8.54167	10.4467	7.00332	36.8149	94.0929	137.546	54.8855	22.7081	43.6143	21.7784	52.994	52.1463	PS(18:4(6Z,9Z,12Z,15Z)/18:4(6Z,9Z,12Z,15Z))
8287.98	8308.3	9123.55	8801.27	5336.95	3019.89	2617.03	4853.32	310.422	207.227	9281.92	334.85	173.782	18.6847	33.2925	28.0135	PS(18:4(6Z,9Z,12Z,15Z)/20:0)
0	0	3.74586	0	142.185	105.255	290.987	547.037	0	7.66523	0	0	0	0	71.4461	0	PS(19:0/20:5(5Z,8Z,11Z,14Z,17Z))
74.7075	53.6216	95.3481	45.9882	37.6395	33.7424	33.8568	53.2354	126.789	100.134	121.752	103.951	30.3358	18.3432	32.6863	30.5903	PS(19:1(9Z)/20:4(5Z,8Z,11Z,14Z))
571.211	701.918	603.124	477.388	1.15466	0	0	0	0	0	0	0	568.357	19.623	0	0	PS(20:0/15:1(9Z))
38.5837	104.849	74.6072	55.0119	155.68	148.573	141.059	175.705	0.192656	0.00217739	0	0	0	0	0	0	PS(20:1(11Z)/20:3(8Z,11Z,14Z))
179.855	67.9812	94.5658	108.322	100.917	88.56	55.1719	92.4233	141.994	65.5517	59.8767	131.612	44.1052	7.90995	24.5361	16.7668	PS(20:2(11Z,14Z)/12:0)
1245.15	482.222	762.161	872.417	754.203	367.783	301.817	720.131	1293.62	449.398	365.407	992.871	101.766	8.27564	117.418	26.4845	PS(20:2(11Z,14Z)/17:0)
0.0434394	0	0.197342	0	0	0	0	0	1473.37	769.162	1471.25	1702.29	305.103	0	5.54767	410.583	PS(20:3(8Z,11Z,14Z)/20:0)
48.4982	47.224	91.3522	67.9015	14.4867	101.073	145.857	138.472	151.686	403.236	271.287	117.651	9.88049	44.1908	33.9977	28.5441	PS(20:3(8Z,11Z,14Z)/20:5(5Z,8Z,11Z,14Z,17Z))
18.2335	31.0929	21.9244	12.3721	19.1284	27.1852	19.2757	19.4928	23.6202	19.7527	36.1138	11.2238	184.161	155.084	247.551	21.406	PS(20:4(5Z,8Z,11Z,14Z)/21:0)
77.6962	54.3047	93.4108	45.7109	46.8811	20.0377	22.4488	33.6021	70.3627	34.4973	82.3841	45.9323	0	0	0	0	PS(20:5(5Z,8Z,11Z,14Z,17Z)/18:0)
2175.25	2147.2	2573.74	1903.28	1462.97	1138.18	876.616	1470.44	3155.96	1233.83	2737.87	3632.67	204.026	301.633	393.398	322.675	PS(20:5(5Z,8Z,11Z,14Z,17Z)/20:0)
697.976	939.363	1092.87	1329.42	1015.08	637.14	564.127	1729.64	1913.26	133.495	687.385	1101.32	413.169	45.8526	6.86642	2.87869	PS(21:0/18:4(6Z,9Z,12Z,15Z))
59.236	25.9645	37.0225	44.8074	150.843	33.7344	18.5156	361.209	137.953	45.021	63.2764	54.602	236.908	15.0181	10.2241	0.475074	PS(21:0/20:5(5Z,8Z,11Z,14Z,17Z))
121.619	32.6117	17.9661	71.0595	89.9782	65.0919	63.79	169.27	166.191	70.8814	11.9201	22.3824	6.70453	0	1.66296	0.00223468	PS(21:0/22:2(13Z,16Z))
0	0	0	0	0	0	0	0	0	0	0	0	2479.28	0	171.69	98.6389	PS(22:0/18:2(9Z,12Z))
5125.48	5879.28	5171.04	7276.01	4948.95	7211.94	6242.05	6412.85	8129.83	9399.12	9324.44	9240.9	9059.31	10551.7	10162.2	11359.8	PS(22:0/21:0)
8.36493	6.82316	0	2.0015	52.6489	71.7508	109.692	154.451	0	0	0	0	0	0	0	0	PS(22:1(11Z)/22:4(7Z,10Z,13Z,16Z))
21483.8	24710.8	30466.3	21298.9	21722.5	18056.3	14225.9	19354.8	21664.7	15630.9	27648.2	26218.5	3394.21	4954.07	6628.05	5883.22	PS(22:4(7Z,10Z,13Z,16Z)/16:0)
22.5626	75.1188	67.3163	11.123	45.4111	35.0985	21.9861	10.4142	128.892	298.079	720.209	166.364	64.6172	45.6191	104.435	128.115	PS(22:4(7Z,10Z,13Z,16Z)/18:3(9Z,12Z,15Z))
144.701	164.123	285.358	104.688	140.872	143.824	152.982	193.123	260.889	314.164	485.816	261.633	38.9503	0	84.7548	66.9033	PS(22:6(4Z,7Z,10Z,13Z,16Z,19Z)/13:0)
0	5.41402	0	0	1363.83	1834.44	1769.6	2182.66	0	0	0	0	0	0	0	0	PS(22:6(4Z,7Z,10Z,13Z,16Z,19Z)/15:1(9Z))
196.683	285.578	245.875	176.538	306.415	728.332	419.897	270.51	278.658	394.192	267.989	157.686	249.72	78.5647	187.753	122.173	PS(22:6(4Z,7Z,10Z,13Z,16Z,19Z)/19:0)
0	0	0	0	2.90529	46.8403	215.11	377.397	1.78145	24.9206	25.7723	0	475.594	0	53.6148	0	PS(22:6(4Z,7Z,10Z,13Z,16Z,19Z)/21:0)
8.0754	0	0	0	3.80807	0	0	3.01636	52.388	32.6044	0	4.96707	141.877	29.7703	85.3506	120.555	PS(22:6(4Z,7Z,10Z,13Z,16Z,19Z)/22:4(7Z,10Z,13Z,16Z))
361.98	14068.4	2917.09	773.847	127270	142267	128972	160429	965.607	976.041	1094.86	919.317	1773.03	0.268472	0.0424884	0.202695	PS(20:5(5Z,8Z,11Z,14Z,17Z)/22:6(4Z,7Z,10Z,13Z,16Z,19Z))
12.5598	0	95.3112	0	3.36585	84.685	40.8683	21.1659	748.919	1099.52	1446.84	769.445	1421.32	711.977	973.725	1648.53	PS(14:1(9Z)/14:1(9Z))
24.0498	11.8465	13.7221	8.96494	15.6403	24.6951	11.6667	7.626	25.3882	34.2024	27.5856	20.8143	81.7599	114.59	53.2545	93.6763	PS(14:0/12:0)
1776.31	1746.22	1991.56	1829.25	1098.75	741.41	641.986	1089.95	114.589	34.8428	92.4811	117.052	294.209	136.002	117.717	276.444	PS(18:1(9Z)/20:1(11Z))
1564.75	0	1866.75	1582.88	1275.5	612.076	0	1039.76	2779.8	584.484	1415.21	1936.43	110.53	604.223	165.957	130.34	PS(O-16:0/14:0)
0	0	1048.8	643.001	985.127	649.309	900.118	1628.89	1155.11	679.803	882.941	1198.35	250.455	762.14	288.482	284.782	PS(O-16:0/14:1(9Z))
0	0	138.523	86.8165	79.9355	41.093	65.2774	185.613	118.115	27.9638	37.5655	64.4622	6.96568	15.8159	2.65525	0.415693	PS(O-16:0/16:1(9Z))
81.8266	18.7674	175.931	130.493	60.7418	38.8525	27.5443	64.8135	360.137	55.5767	107.694	117.803	33.2403	54.5486	23.1739	23.8575	PS(O-18:0/14:0)
59.0571	0	55.8094	37.4274	14.69	40.79	0	32.4383	42.3917	17.8276	39.5315	4.11506	55.1497	27.0052	40.4592	29.6544	PS(O-20:0/18:2(9Z,12Z))
797.807	782.89	702.734	479.347	549.465	641.577	526.752	667.433	558.228	711.799	915.851	49.8538	855.025	0	929.917	8.06836	PS(O-20:0/22:2(13Z,16Z))
17.875	33.6323	53.081	6.3618	107.329	88.8856	99.9225	93.5518	0	83.8181	33.8085	0	37.725	16.3361	51.0573	66.364	PS(O-20:0/22:6(4Z,7Z,10Z,13Z,16Z,19Z))
336.116	422.225	332.123	496.759	510.336	285.219	353.502	338.903	543.609	385.858	556.71	973.894	766.563	1028.73	583.675	662.836	PS(P-16:0/13:0)
0	0	176.337	76.9402	283.465	182.205	314.309	663.164	84.4674	150.65	77.8487	129.007	61.4275	156.717	61.2443	74.7092	PS(P-16:0/14:1(9Z))
1.69104	2.27171	3.09124	3.59598	0.513891	20.3826	2.48621	7.58068	1.25953	21.6841	14.422	0	136.303	30.998	64.7407	46.2694	PS(P-16:0/20:0)
42.345	66.0959	94.7986	13.4985	193.116	169.551	286.182	105.416	12.7279	176.561	121.045	0.480377	280.891	266.092	367.877	576.166	PS(P-16:0/20:5(5Z,8Z,11Z,14Z,17Z))
167.011	184.616	83.5182	222.347	59.5887	159.428	259.685	206.415	130.544	381.252	355.494	139.439	116.185	0	37.2014	10.1097	PS(P-16:0/22:2(13Z,16Z))
146.165	115.745	119.126	167.816	178.302	116.08	119.833	133.795	122.068	140.922	145.541	242.317	148.605	101.434	80.4416	55.0553	PS(P-20:0/19:1(9Z))
225.676	207.503	221.995	180.278	1672.39	1314.62	2871.15	2690.5	264.426	1174.03	319.582	556.937	1258.52	5045.13	1841.29	1552.97	PS(P-20:0/22:2(13Z,16Z))
0	0	0	0	0	0	0	0	0	0	0	0	538.278	170.444	29.0735	21.2622	PS(P-16:0/18:1(9Z))
4253.39	5046.06	5330.09	4461.93	1878.09	1111.02	785.442	2240.14	0	2.71795	37.3288	36.6378	19.3549	3.32721	0.0194629	17.2437	PS(18:2(9Z,12Z)/18:2(9Z,12Z))
302.519	353.818	444.267	633.396	369.005	439.017	353.071	455.071	2129.35	750.659	1254.61	1321.04	498.464	464.986	363.261	372.876	PS(20:0/0:0)
20031	22335.3	18106.3	24619.4	35194.1	36770.2	33007.3	34450.6	732.576	813.749	861.976	599.037	1902.76	0	0	0	PS(20:5(5Z,8Z,11Z,14Z,17Z)/0:0)
0	0	0	0	0	0	3.36628	0	0	0	0	0	135.254	192.806	156.575	246.306	PS(19:0/0:0)
239.245	42.9098	33.7761	163.564	385.204	111.6	86.515	415.866	0	234.497	96.8238	12.8519	464.631	0.13635	35.5942	14.6297	PS(14:1(9Z)/0:0)
195.137	78.6668	131.863	152.504	38.2028	13.7953	3.98839	45.5889	5.69336	0	0	12.8471	2.22979	0	0	0	PI(18:1(9Z)/22:6(4Z,7Z,10Z,13Z,16Z,19Z))
1703.57	0	1394.59	0	679.236	880.513	973.185	1306.57	2236.53	1668.73	1249.62	1916.18	152.9	12.018	294.752	270.828	PI(12:0/14:1(9Z))
18.8386	4.41859	72.8525	0	77.9324	153.384	108.523	51.1308	17.8668	0	59.7362	16.6444	0	0	0	0	PI(12:0/17:0)
67.6554	112.665	130.624	40.1907	23.2525	4.14436	0	4.30081	372.813	225.75	550.269	521.483	378.626	453.319	238.777	608.753	PI(13:0/18:0)
4088.83	174.887	3860.98	2291.72	2268.26	1991.14	1906.67	1987.68	3429.25	2113.25	3461.34	4592.58	348.056	1059.68	817.281	669.46	PI(13:0/22:6(4Z,7Z,10Z,13Z,16Z,19Z))
16180.3	5630.1	14684.8	9595.82	11521.7	9385.81	8762.78	12857.8	13223.9	10155.2	16023.7	25571.9	2950.99	6111.07	7093.9	8115.2	PI(14:0/19:1(9Z))
0	0	83.9235	39.6608	83.1521	82.9146	72.3671	81.0779	41.2591	79.2248	77.2138	80.7757	5.01354	0	33.9875	30.2441	PI(15:0/17:1(9Z))
4239.56	5257.71	5070.95	4617.37	2979.52	2218.37	2028	3451.85	6376.72	2383.35	5224.06	6042.89	992.674	1516.71	1394.88	1144.63	PI(15:0/18:3(6Z,9Z,12Z))
3.95273	11.5721	23.5922	28.0655	3.57489	0	22.5111	30.0857	0	159.382	75.3556	2.76118	0.0192898	0	4.45489	0	PI(15:0/20:4(5Z,8Z,11Z,14Z))
1921.91	0	0	1.77735	0	0	0	0	0	0	0	0	0	0	0	0	PI(15:0/20:5(5Z,8Z,11Z,14Z,17Z))
424.481	136.712	153.221	228.111	414.521	287.897	243.241	526.193	688.531	446.846	169.421	440.96	364.628	105.405	77.1055	48.8068	PI(15:1(9Z)/12:0)
5909.31	1472.07	2211.96	4511.35	4139.4	1003.64	941.267	4707.4	4111.76	1535.46	1527.41	3311.66	1236.68	660.928	784.141	689.041	PI(15:1(9Z)/17:1(9Z))
657.128	0	667.553	434.356	488.973	372.366	294.526	295.651	361.98	242.1	412.078	508.591	7.4796	0	37.8503	31.6589	PI(15:1(9Z)/18:1(9Z))
218.431	25.5312	28.8747	92.0514	168.269	103.121	23.8712	167.594	92.9431	59.5809	4.61542	11.798	68.9266	13.573	18.4347	11.7029	PI(15:1(9Z)/18:4(6Z,9Z,12Z,15Z))
0	0	74.8991	62.0403	81.6262	37.6474	0	25.5344	57.3843	69.9354	105.871	125.217	15.078	0	0	0	PI(15:1(9Z)/20:1(11Z))
112.698	2.10405	5.93608	48.8272	109.864	5.6092	1.87972	105.645	0	0	0	0	33.4447	0	0	0	PI(16:1(9Z)/18:3(6Z,9Z,12Z))
1014.54	0	796.762	558.515	334.044	391.716	0	665.782	1007.14	589.336	1014.4	1435.23	0	736.614	313.119	247.789	PI(17:0/18:3(6Z,9Z,12Z))
331.56	351.909	384.945	334.421	139.467	139.208	94.0541	192.046	7229.18	4419.74	754.893	6919.61	3715.74	5093.42	2664.34	1818.18	PI(17:0/18:4(6Z,9Z,12Z,15Z))
6592.23	1331.3	5921.73	3889	4523	4552.01	4874.54	5140.37	4906.57	3781.45	4966.59	5338.75	1049.58	3015.17	2214.61	1806.41	PI(17:1(9Z)/18:3(6Z,9Z,12Z))
357.219	806.985	341.621	378.798	300.819	538.054	340.813	191.376	67.934	469.676	546.776	0	83.84	0	130.44	139.344	PI(17:1(9Z)/21:0)
3731.82	3572.95	3983.79	2976.46	2344	2004.65	1687.96	2278.47	4161.18	1854.82	3343.41	4367.46	267.808	526.674	656.818	584.421	PI(17:2(9Z,12Z)/18:4(6Z,9Z,12Z,15Z))
0	0	0	0	0	0	0	0	755.733	338.896	14.9476	662.674	382.238	233.377	316.904	371.108	PI(17:2(9Z,12Z)/22:4(7Z,10Z,13Z,16Z))
788363	842664	765975	893409	513182	458373	397831	489893	5348.1	4629.82	5657.51	4580.86	7430.29	61.8657	215.984	304.194	PI(17:2(9Z,12Z)/22:6(4Z,7Z,10Z,13Z,16Z,19Z))
36.3396	99.8633	98.3704	52.432	122.665	533.606	252.906	106.747	80.9145	188.508	113.92	77.2257	1.70085	0	18.3246	16.1771	PI(18:0/17:2(9Z,12Z))
3463.52	0	1067.52	81.9243	1972.64	500.603	532.977	2033.39	1328.68	626.31	464.746	1156.68	329.986	5.76725	297.012	312.181	PI(18:1(9Z)/14:1(9Z))
386.47	85.9247	1738.88	1161.03	815.653	705.914	614.161	920.322	2059.7	683.971	1475.96	2392.42	58.0469	226.086	181.375	124.314	PI(18:4(6Z,9Z,12Z,15Z)/17:1(9Z))
841.457	0	42.832	0	483.315	330.772	45.4173	350.771	224.661	69.5671	6.35397	5.23509	116.746	0	10.2912	3.13455	PI(18:4(6Z,9Z,12Z,15Z)/18:3(9Z,12Z,15Z))
146.73	0	143.115	65.6415	80.7535	32.7812	39.403	70.3344	59.2067	74.1746	112.05	117.597	40.5823	23.3192	40.6118	27.2936	PI(18:4(6Z,9Z,12Z,15Z)/20:5(5Z,8Z,11Z,14Z,17Z))
567.985	636.992	938.945	717.042	389.966	248.194	121.057	557.609	4069.86	2156.72	3153.71	4304.6	1193.2	1208.38	1144.44	1499.57	PI(18:4(6Z,9Z,12Z,15Z)/22:1(11Z))
43.7151	18.8776	8.5825	51.8118	62.3428	34.1358	43.121	177.75	125.085	38.8233	0	14.2531	548.018	60.9655	5.8542	0	PI(19:0/22:6(4Z,7Z,10Z,13Z,16Z,19Z))
1048.38	1080.78	1107.07	801.217	702.925	571.628	417.104	574.481	0	0	0	0	5.54925	0	0	11.8948	PI(19:1(9Z)/22:6(4Z,7Z,10Z,13Z,16Z,19Z))
53.338	23.5528	87.1228	108.93	497.778	216.789	212.584	788.288	241.044	95.4332	1.16696	7.79293	228.437	0	17.7957	0	PI(20:1(11Z)/22:2(13Z,16Z))
44.417	184.148	132.133	123.999	456.728	1042.08	777.822	816.303	206.757	384.527	364.132	340.087	179.265	607.507	573.209	627.335	PI(20:2(11Z,14Z)/14:0)
858.193	160.401	203.711	342.514	503.994	427.099	140.1	409.387	265.9	298.235	73.8045	170.913	234.001	57.3948	41.2512	20.2615	PI(20:2(11Z,14Z)/16:1(9Z))
231.326	0	205.039	143.025	105.176	54.2674	31.0836	102.782	206.017	56.5089	140.105	433.5	0	0	46.2555	28.0634	PI(20:3(8Z,11Z,14Z)/15:0)
7.62015	0	1.32197	1.99523	4.09372	0	0	15.1268	850.41	526.256	412.289	544.975	543.195	183.782	47.3336	90.3034	PI(20:3(8Z,11Z,14Z)/22:0)
1420.9	201.666	916.667	827.485	791.35	779.136	798.738	901.208	979.104	761.765	1043.36	1446.73	243.438	463.861	465.384	540.289	PI(20:4(5Z,8Z,11Z,14Z)/15:0)
0	0.999459	82.0914	46.4094	109.753	137.941	91.282	103.011	9.20831	32.3774	51.1465	12.0033	27.3374	71.2693	33.0398	34.5703	PI(20:4(5Z,8Z,11Z,14Z)/18:4(6Z,9Z,12Z,15Z))
3435.61	3736.97	3352.17	3736.61	2701.29	2481.78	2209.52	2586.66	0	4.70959	61.1345	2.80453	90.091	0	4.97269	26.9927	PI(20:4(5Z,8Z,11Z,14Z)/20:1(11Z))
958.467	1001.42	856.385	938.889	733.439	766.902	681.2	734.575	1114.49	623.614	880.924	1167.72	169.356	339.245	450.614	512.422	PI(21:0/18:2(9Z,12Z))
1540.51	0	1194.98	1075.38	1145.58	1012.36	936.145	1034.77	1379.3	1039.27	1534.08	2375.06	447.449	812.761	568.59	593.252	PI(22:1(11Z)/22:4(7Z,10Z,13Z,16Z))
329.103	174.884	217.328	139.118	14.8628	65.4024	49.3784	58.5775	464.195	265.343	307.402	380.751	323.15	660.64	6.28035	508.279	PI(22:1(11Z)/22:6(4Z,7Z,10Z,13Z,16Z,19Z))
5595.99	164.291	4479.86	3404.71	4376.06	3364.32	3212.22	4289.46	4756.48	3604.76	4597.19	7319.2	1294.24	1808.21	1232.45	1253.01	PI(22:2(13Z,16Z)/22:6(4Z,7Z,10Z,13Z,16Z,19Z))
13.3552	0	63.0111	37.9887	41.3977	3.34896	11.7019	33.5088	33.6379	3.0653	35.0109	5.24305	3.15848	22.7824	6.15982	0	PI(22:6(4Z,7Z,10Z,13Z,16Z,19Z)/16:1(9Z))
388830	460501	331695	235931	213053	183410	183417	210779	305355	273996	338411	375277	132123	163505	146255	165848	PI(22:6(4Z,7Z,10Z,13Z,16Z,19Z)/17:2(9Z,12Z))
3215.86	3540.76	3005.79	4004.84	2467.32	2249.41	1929.57	2136.43	0	0	0	0	2.86505	0	0	0	PI(22:6(4Z,7Z,10Z,13Z,16Z,19Z)/21:0)
0	0	0	0	489.768	676.865	693.553	809.676	0	0	0	0	0	0	0	0	PI(22:6(4Z,7Z,10Z,13Z,16Z,19Z)/22:0)
44.6822	1632.33	0	0	0	16.114	0	0	0	0	0	0	0	0	0	0	PI(22:6(4Z,7Z,10Z,13Z,16Z,19Z)/22:1(11Z))
0	0	0.0151351	0	0	0	0	0	5576.46	2639.86	3750.24	5704.2	2046.32	2719.47	1712.51	1943.56	PI(22:6(4Z,7Z,10Z,13Z,16Z,19Z)/22:2(13Z,16Z))
6810.99	610.506	5359.24	4125.32	2537.59	1694.76	1377.52	2958.6	6131.8	2068.47	5211.18	9452.94	332.559	979.071	830.402	712.429	PI(21:0/12:0)
2197.77	442.637	410.505	1086.04	1570.49	1452.81	550.752	1539.5	2187.1	575.323	172.481	566.577	911.576	98.0434	128.964	88.7108	PI(20:5(5Z,8Z,11Z,14Z,17Z)/18:1(9Z))
804.525	0	642.615	521.498	262.891	187.535	137.269	230.397	466.024	425.448	746.591	560.323	103.936	43.9759	77.2523	107.335	PI(20:0/22:6(4Z,7Z,10Z,13Z,16Z,19Z))
761.26	466.067	656.646	488.727	475.96	203.018	131.963	497.366	2352.52	1251.07	967.73	1801.68	1677.88	492.766	595.422	1249.46	PI(17:0/22:6(4Z,7Z,10Z,13Z,16Z,19Z))
188.595	87.8902	155.161	110.275	104.398	70.7548	52.3886	162.458	0	14.5815	288.107	0	235.507	122.144	190.117	58.0235	PI(17:0/18:0)
68.5863	0	1810.88	985.736	922.313	724.233	1081.04	795.713	900.106	835.956	1179.42	1112.08	64.6477	95.1703	207.639	209.234	PI(15:0/16:0)
2176.73	2047.42	2369.51	2454.49	1298.81	2562.98	1861.79	2596.6	3894.11	2965.13	2675.24	2982.17	553.694	348.25	755.3	561.756	PI(14:0/18:3(9Z,12Z,15Z))
0.327526	0.0443915	0.84349	0.387347	0.258058	0.455832	0.146472	0.484694	0	18.3074	0	262.121	2246.02	2235.78	2851.37	3356.1	PI(12:0/16:0)
15.5601	0	13.4007	12.5308	178.257	76.3139	260.652	533.398	19.2112	45.0516	0	0.724982	5.52317	9.16452	6.39796	52.3114	PI(22:0/22:0)
0	0	349.845	187.048	207.173	225.063	214.802	125.238	59.7354	127.182	149.576	77.0364	0	0	24.1323	21.9633	PI(16:1(9Z)/16:1(9Z))
10.758	0	377.82	161.639	164.663	135.75	140.333	150.995	141.335	146.641	230.892	175.571	0	0	3.70925	6.96509	PI(O-16:0/12:0)
222.442	351.927	433.661	416.226	557.167	338.075	322.902	802.546	468.402	111.444	305.658	446.741	30.4275	0	9.87079	3.13771	PI(O-16:0/14:1(9Z))
348.384	493.63	859.72	307.457	601.914	449.527	458.819	513.119	837.534	940.931	1536.16	1103.7	121.076	7.90685	161.31	122.177	PI(O-18:0/13:0)
1452.22	1132.71	1557.66	933.123	348.475	362.616	360.909	384.79	176.225	279.393	329.087	4.6957	42.7386	21.1841	8.17956	9.01755	PI(O-18:0/18:2(9Z,12Z))
110.838	95.6878	89.6551	60.4291	46.4293	32.6767	40.5264	39.4983	0	0	0	0	0	0	0	0	PI(O-18:0/18:3(6Z,9Z,12Z))
219.788	148.787	172.787	88.356	32.5671	51.3386	30.8264	30.6143	0	0	0	0	0	0	0	0	PI(O-18:0/18:4(6Z,9Z,12Z,15Z))
382.939	283.186	303.264	222.725	598.563	567.381	669.628	803.276	419.083	830.529	432.262	382.082	2585.33	2141.38	1857.23	1900.03	PI(O-18:0/21:0)
370.205	327.309	310.194	365.775	210.981	274.487	199.236	285.983	457.008	274.499	331.642	472.294	282.15	386.75	333.33	246.054	PI(O-20:0/18:2(9Z,12Z))
329.29	140.29	81.0282	276.326	255.368	233.251	225.843	484.06	491.674	156.724	43.1638	106.993	39.5993	0	20.6595	17.9495	PI(O-20:0/22:4(7Z,10Z,13Z,16Z))
54.3071	78.4468	69.6822	75.8107	98.5786	85.6736	72.2747	86.5552	134.246	73.7742	44.8736	207.507	77.1235	72.5329	61.5266	7.5391	PI(O-20:0/16:0)
15.7143	0	235.717	179.641	174.372	137.929	145.46	173.424	173.103	105.299	181.164	175.11	3.75559	5.97987	72.2446	52.0213	PI(O-16:0/18:3(9Z,12Z,15Z))
97.8047	414.003	82.5955	49.5682	49.6336	34.0397	2.35781	59.5451	46.9815	52.3682	63.8485	80.3097	7.71654	0	8.80594	22.4848	PI(O-16:0/18:2(9Z,12Z))
72.3654	129.657	158.678	59.2638	557.076	294.94	487.63	200.35	28.0308	334.568	208.904	28.5855	10.6849	2.49413	0	109.068	PI(P-16:0/12:0)
134.539	417.033	19239.6	14421.9	13298.3	13281.5	12709.1	12531.9	15380.5	13431.4	17509.4	21777.7	2577.38	5545.55	6385.01	7377.72	PI(P-16:0/14:1(9Z))
140.431	246.544	345.491	351.278	398.859	219.254	197.86	738.99	449.782	79.0762	461.769	408.615	7.68858	0	2.44864	0	PI(P-16:0/19:0)
1.13637	1.13866	0.559901	0.123074	0	0.00278508	12.4809	3.88255	762.027	402.669	61.3129	807.343	235.975	193.908	267.122	268.473	PI(P-16:0/20:2(11Z,14Z))
0	0	0	0	4.83578	0	5.14371	0	25.2957	6.708	64.5564	0	11.393	25.17	7.03747	13.1266	PI(P-16:0/20:5(5Z,8Z,11Z,14Z,17Z))
8141.91	3304.95	8110.97	4788.82	5930.6	4652.46	4254.43	6288.76	6342.63	5418.31	8432.83	12276.8	1036.28	2083.01	2934.33	3276.17	PI(P-18:0/12:0)
139.883	202.366	250.088	267.046	181.059	91.6037	67.3656	322.421	445.657	19.4678	178.243	259.452	0	0	0	0	PI(P-18:0/15:0)
253.126	275.169	247.002	317.193	173.827	225.871	194.471	205.852	241.996	140.891	196.758	231.827	199.948	291.604	147.391	170.908	PI(P-18:0/18:3(9Z,12Z,15Z))
294.513	577.721	181.468	11.5628	173.292	379.677	398.585	306.07	156.305	1131.09	912.526	2165.34	82.192	56.4797	129.976	60.6563	PI(P-18:0/18:4(6Z,9Z,12Z,15Z))
2167.47	661.154	985.19	1330.53	1181.32	848.169	546.257	1095.92	1646.4	711.785	764.757	1334.52	187.393	148.159	217.989	116.642	PI(P-18:0/20:5(5Z,8Z,11Z,14Z,17Z))
0	1.91296	6.7689	0	12.5832	46.2796	135.132	156.411	0	7.6138	0	0	0	0	0	0	PI(P-20:0/13:0)
103.269	56.0215	83.7038	43.1618	5.79341	14.155	17.8933	10.7898	187.395	163.751	205.03	261.913	188.543	438.092	494.514	326.967	PI(P-20:0/19:1(9Z))
55.2416	43.6507	41.3146	25.2045	627.771	473.454	1100.42	1028.95	72.1458	433.804	105.961	194.321	493.023	2028.21	747.485	603.253	PI(P-20:0/22:2(13Z,16Z))
255.227	85.2838	136.996	259.728	220.958	179.52	189.815	302.991	175.864	60.3513	20.2015	3.00376	3.92698	0	0	0	PI(P-20:0/22:4(7Z,10Z,13Z,16Z))
160.582	126.849	121.757	103.314	21.8518	16.1822	0	0	476.428	480.795	98.2894	1264.4	428.924	29.6139	58.9993	2006.96	PI(P-16:0/22:6(4Z,7Z,10Z,13Z,16Z,19Z))
0	0	2.13687	0	5.79027	0	1.41158	0	55.1729	2.0705	29.1696	4.9884	13.3364	0	0	74.7313	PI(18:2(9Z,12Z)/0:0)
0	0	0	0	0	0	0	0	0	0	0	0	0	0	0	0	PI(22:4(7Z,10Z,13Z,16Z)/0:0)
65.3427	110.608	94.2077	36.9601	152.928	174.841	258.049	170.856	120.272	430.595	303.329	103.344	437.773	372.876	531.955	436.85	PI(15:1(9Z)/0:0)
43.1611	0	35.6136	0	59.6542	57.0814	42.2607	26.6373	45.8453	0	115.868	131.17	98.3535	328.519	145.878	0	PI(18:4(6Z,9Z,12Z,15Z)/0:0)
573.523	605.786	329.213	326.675	933.69	795.541	645.209	429.871	1076.59	569.283	1003.85	2098.57	396.527	174.505	909.358	618.94	PI(19:1(9Z)/0:0)
0	0	0	0	0	0	0	0	0	0	0	0	0	0	0	0	PI(22:1(11Z)/0:0)
8.16839	0	18.2311	0	10.7487	13.7906	7.31151	11.8051	10.2568	2.11211	0	0	22.4997	0	0.578509	0.178103	PI(22:2(13Z,16Z)/0:0)
0	0	0	0	10.8043	8.85188	4.55354	1.30094	0	16.8421	0	15.8217	0	0	55.0309	62.1861	PI(22:0/0:0)
0	0	0	0	0	0	0	0	0	0	2.61169	3.46391	0	0	0	2.76774	PI(21:0/0:0)
159.718	47.1959	120.892	80.4153	105.974	64.8426	88.7246	53.9972	6.0854	7.13831	2.47521	0	64.3222	0	1.85753	47.5549	PI(17:1(9Z)/0:0)
0	0	0	0	0	0	0	0	0	0	0	0	0	0	0	0	PI(O-18:0/0:0)
358.031	0	296.888	206.131	233.84	325.054	0	306.169	177.939	329.646	323.586	254.248	155.848	167.74	301.732	351.768	PI(21:0/22:6(4Z,7Z,10Z,13Z,16Z,19Z))
1551.03	1312.53	1529.11	1195.21	795.93	693.645	423.54	752.176	1509.84	1071.01	1026.4	1321.95	1027.76	824.462	599.319	697.596	PG(13:0/14:0)
0	0	0	0	84.4587	40.7157	130.373	78.9318	0	54.6398	1.42022	0	220.549	434.315	298.936	402.367	PG(14:1(9Z)/16:0)
56.1873	17894.7	276.521	118.698	154.616	58.5035	148.598	81.4734	93.9729	106.74	266.778	113.114	2.5476	0	1.95888	4.34605	PG(14:1(9Z)/22:0)
41.6542	106.637	64.1518	59.2808	91.3416	471.032	250.383	198.992	154.904	532.345	292.146	389.141	50.8771	13.8273	37.3774	9.68563	PG(15:0/22:2(13Z,16Z))
1204.89	2095.25	1750.57	1318.19	137.805	59.9149	28.2624	133.653	3.29762	12.1523	18.281	55.7989	27.0875	6.94289	0	14.0179	PG(17:0/22:2(13Z,16Z))
202.165	2.4959	40.3921	123.359	147.144	12.5918	4.51483	211.465	119.955	56.1284	34.3383	12.907	44.0889	0	3.26983	0	PG(17:2(9Z,12Z)/14:0)
9562.19	0	6803.04	5802.73	4199.66	2436.49	2454.64	3878.74	5582.51	3703.29	6864.41	5419.79	1996.57	2870.29	2590.09	2748.56	PG(18:3(6Z,9Z,12Z)/18:0)
0	0	0	0	0	0	0	0	833.993	154.225	48.6145	557.427	28.3942	0	0	20.048	PG(18:3(6Z,9Z,12Z)/22:6(4Z,7Z,10Z,13Z,16Z,19Z))
3.51391	10177.7	315.324	165.113	166.825	131.399	116.263	95.629	51.0912	88.8789	120.001	41.416	0	0	12.6655	0	PG(18:3(9Z,12Z,15Z)/18:0)
2537.19	0	2477.44	0	1805.52	1256.36	1721.57	3844.59	3879.45	2499.96	1707.25	3057.63	336.485	183.186	216.125	506.937	PG(18:4(6Z,9Z,12Z,15Z)/13:0)
32.3535	24.5382	10.3626	13.7691	12.0925	87.8015	29.8441	70.4088	353.112	285.402	83.087	155.746	147.03	21.4414	100.761	61.8638	PG(18:4(6Z,9Z,12Z,15Z)/15:1(9Z))
0	0	119.62	36.4655	68.8523	54.8305	53.3861	57.5488	18.1864	67.3145	88.5172	23.1184	62.0765	24.7587	91.1793	99.2136	PG(18:4(6Z,9Z,12Z,15Z)/17:0)
30.6206	75.9449	133.788	38.6615	106.067	419.421	229.142	94.8297	108.414	185.531	173.19	108.986	20.9733	0	37.0732	31.5938	PG(18:4(6Z,9Z,12Z,15Z)/18:1(9Z))
554.643	195.45	254.698	526.46	550.726	121.298	72.4259	391.786	446.512	59.2755	43.9368	90.7818	102.488	0	0	0	PG(18:4(6Z,9Z,12Z,15Z)/19:0)
0	0	0	0	0	0	634.227	688.214	0	19.0435	0	0	210.106	0	0	0	PG(20:0/22:1(11Z))
0	0	107.357	94.2835	67.2167	39.2528	32.8983	45.2458	70.3711	37.9945	110.798	67.3357	7.68128	0	9.04926	0	PG(20:3(8Z,11Z,14Z)/14:0)
1085.33	1796.58	2005.13	1420.69	937.72	598.186	419.882	638.75	0	0	0	0	0	0	54.1439	0	PG(20:4(5Z,8Z,11Z,14Z)/18:4(6Z,9Z,12Z,15Z))
66.9734	159.802	175.352	81.1392	563.948	291.681	497.416	241.933	38.0093	338.105	217.777	30.1797	7.86031	19.5686	0	53.2341	PG(20:5(5Z,8Z,11Z,14Z,17Z)/15:0)
947.738	5454.92	19.2176	0	552.354	163.554	10.3552	419.465	282.781	27.0266	5.05447	38.6063	93.0598	0	0.397334	63.5648	PG(20:5(5Z,8Z,11Z,14Z,17Z)/20:4(5Z,8Z,11Z,14Z))
134.133	146.695	189.869	100.469	150.722	228.033	194.788	85.7839	0	0	0	0	47.3583	0	0	0	PG(21:0/20:4(5Z,8Z,11Z,14Z))
1013.84	1016.63	909.209	898.883	587.172	397.609	360.431	625.019	100.196	18.742	74.0172	150.491	0.159919	0.00216795	0	0.000231939	PG(21:0/22:4(7Z,10Z,13Z,16Z))
54.7173	7.27235	0	0	0	0	0	0	0	0	0	0	0	0.124753	5.91103	0	PG(22:0/19:1(9Z))
150.14	204.807	156.055	135.551	186.561	231.429	0	0	108.319	0	171.548	0	8.1622	0	0	203.916	PG(22:1(11Z)/22:0)
784.145	840.426	135.907	473.464	0	0	0	0	0	0	0	0	0	0	0	0	PG(22:1(11Z)/22:2(13Z,16Z))
309754	306641	336541	285787	187823	207675	184385	191502	184051	174188	221392	187087	118406	150737	93658.5	166147	PG(22:2(13Z,16Z)/20:5(5Z,8Z,11Z,14Z,17Z))
533.238	0	476.948	261.506	274.096	203.52	223.545	261.022	3.89558	138.985	415.612	549.958	43.4517	57.5553	86.638	35.3985	PG(22:4(7Z,10Z,13Z,16Z)/18:0)
7122.08	7638.26	8607.01	6413.78	6966.45	6630.12	5720.25	7477.87	272.877	132.129	6650.87	129.526	392.553	177.002	727.757	229.61	PG(22:4(7Z,10Z,13Z,16Z)/20:5(5Z,8Z,11Z,14Z,17Z))
483.549	505.653	0	0	504.961	647.411	647.618	838.85	0	0	0	0	0	0	1038.77	3.06316	PG(22:4(7Z,10Z,13Z,16Z)/22:0)
607.781	626.716	593.641	566.484	393.881	300.79	261.435	409.138	0	0	0	0	0	0	0	0	PG(22:6(4Z,7Z,10Z,13Z,16Z,19Z)/17:0)
5477.83	4.84737	4729.23	2809.12	2667.07	2357.83	2307.42	2382.21	3019.37	2728.8	3852.87	4168.7	486.332	0	994.77	1053.34	PG(22:6(4Z,7Z,10Z,13Z,16Z,19Z)/18:3(9Z,12Z,15Z))
299.313	0	150.134	0	216.029	110.746	133.861	418.704	473.251	429.902	103.238	177.928	922.236	0	27.4658	25.3087	PG(22:6(4Z,7Z,10Z,13Z,16Z,19Z)/20:5(5Z,8Z,11Z,14Z,17Z))
5109.33	260.028	27324.9	16605.5	19356.5	17400.2	15999.3	16614	15263.2	11826.2	17643.7	19268.9	3447.91	7464.59	6799.18	6001.63	PG(22:6(4Z,7Z,10Z,13Z,16Z,19Z)/16:0)
0	0	379.482	234.165	181.452	144.265	139.128	186.312	218.279	134.951	270.625	228.548	55.2293	18.7487	29.0115	21.9316	PG(20:4(5Z,8Z,11Z,14Z)/16:0)
1063.06	12.0414	355.786	0	563.235	203.207	189.042	592.871	375.941	149.848	121.536	317.673	0	15.4091	56.8513	39.2228	PG(16:0/18:4(6Z,9Z,12Z,15Z))
72.7913	95.9579	89.186	96.1533	74.2248	134.063	96.5548	120.888	140.471	177.351	228.363	185.263	197.851	134.137	216.814	252.216	PG(20:0/22:0)
0	23.3951	1886.76	1633.55	1429.84	1325.31	1461.45	1269.25	1855.83	1230.84	1811.74	2172.32	394.284	969.247	813.89	891.625	PG(22:6(4Z,7Z,10Z,13Z,16Z,19Z)/22:6(4Z,7Z,10Z,13Z,16Z,19Z))
1830.66	1789.94	1709.41	969.374	1732.65	2950.96	1966.59	424.711	692.392	930.945	1928.33	988.522	87.4748	2272.64	354.009	591.176	PG(O-16:0/12:0)
0	1.91698	0	0	30.7706	8.29869	15.3525	26.1787	0	28.9043	0	0	50.2849	3.6891	62.967	109.089	PG(O-18:0/22:6(4Z,7Z,10Z,13Z,16Z,19Z))
699.273	503.293	712.251	234.343	0	75.8628	7.4022	3.39685	221.085	231.912	347.168	622.266	350.389	399.869	148.298	277.815	PG(P-18:0/14:1(9Z))
76.2438	0	101.032	60.1047	63.7193	60.8822	61.6978	67.6508	83.0588	103.928	128.142	144.413	44.4934	118.608	78.9331	58.8513	PG(P-18:0/17:2(9Z,12Z))
232.936	258.699	244.274	149.077	262.419	288.641	0	0	0	0	0	0	0	0	0	0	PG(P-18:0/21:0)
0.752974	0.224332	0.271082	0	0.947664	0.0021287	4.34925	2.57969	0.0885154	0.0295459	13.4963	0	5.68209	0	12.5374	0.277348	PG(P-20:0/21:0)
0	0	47.8072	43.8856	38.5727	19.6793	35.3408	32.1918	21.445	12.6198	19.8814	3.97884	0	0	1.44241	0	PG(12:0/0:0)
37.6799	0	11.8462	0	3.10475	0	0.151242	7.15849	71.4648	370.351	207.489	34.8389	177.569	0	209.687	143.015	PG(22:4(7Z,10Z,13Z,16Z)/0:0)
0.000223151	0	2.53536	0	20.8852	35.8047	57.2373	5.10862	44.2014	50.1934	36.9602	24.4472	319.923	0	318.232	267.386	PG(17:2(9Z,12Z)/0:0)
68.7168	71.2282	56.0136	94.4109	16.1666	30.3909	22.7154	26.7335	98.3341	52.1821	82.858	119.066	52.7885	30.8093	59.1952	28.858	PG(O-20:0/0:0)
111.722	90.9306	148.452	39.706	18.9139	44.9364	50.4514	49.9447	19.6499	99.235	72.6914	112.545	99.3036	6.9606	16.3617	9.1456	PG(P-20:0/0:0)
217.29	0	192.387	0	244.649	316.366	636.108	265.845	160.717	394.195	288.444	172.098	457.518	0	709.573	765.012	PG(8:0/8:0)
0	0	0	0	0	0	0	0	30.6746	1.94296	0	2.85856	0.781307	0	0	0	PG(12:0/12:0)
10.1301	11.7163	0	7.95262	4.77636	6.50376	0	0	2.35062	105.826	245.932	46.2406	434.865	105.348	102.651	123.657	PG(16:0/0:0)
204.235	209.637	200.622	219.921	107.75	188.518	151.873	141.827	0	2.3457	0	0	9.82808	0	0	0	PG(20:4(5Z,8Z,11Z,14Z)/0:0)
86.8591	138.438	153.004	50.1349	85.6874	181.542	148.595	96.6495	0	0	0	0	0	0	41.1827	14.5167	TG(12:0/12:0/18:0)[iso3]
18.4143	19.9364	13.5399	8.98627	4.00921	0	0	0	29.3025	34.2475	60.5007	49.8688	18.8903	18.3161	59.5146	26.3877	TG(13:0/14:0/14:0)[iso3]
1253.97	1080.61	1078.82	1131.03	702.824	1018.93	778.984	1000.16	1237.91	1097.05	1051.11	1057.17	1492.48	1364.44	1406.1	1059.15	TG(14:1(9Z)/14:1(9Z)/22:6(4Z,7Z,10Z,13Z,16Z,19Z))[iso3]
25.9331	193.114	167.69	2.24109	77.9943	338.034	159.149	216.847	0	396.045	22.811	0	685.758	138.373	460.962	755.578	TG(12:0/13:0/18:4(6Z,9Z,12Z,15Z))[iso6]
23.7567	19.0434	17.3078	12.6937	64.0533	141.147	99.3118	107.775	30.5016	177.616	90.8704	0	233.482	211.714	254.814	237.386	TG(12:0/14:1(9Z)/16:1(9Z))[iso6]
681.272	849.723	914.963	370.244	1083.81	1120.6	0	0	7.96278	0	39.0731	411.115	0	0	0	0	TG(12:0/14:1(9Z)/18:3(9Z,12Z,15Z))[iso6]
0	0	0	0	0	0	0	0	0	0	0	0	128.484	569.673	408.749	494.014	TG(12:0/14:1(9Z)/18:4(6Z,9Z,12Z,15Z))[iso6]
4.13565	4.93795	5.07462	2.14171	0.641163	4.48156	3.58712	1.49722	1.97611	18.9209	10.3913	2.26478	197.407	38.9955	10.9484	10.3284	TG(12:0/16:0/20:5(5Z,8Z,11Z,14Z,17Z))[iso6]
221.752	285.764	196.592	242.921	175.259	182.129	132.198	158.554	178.621	122.94	214.004	262.644	209.64	168.022	176.186	37.0507	TG(12:0/18:4(6Z,9Z,12Z,15Z)/20:3(8Z,11Z,14Z))[iso6]
63.7234	66.7987	48.444	85.1604	189.73	384.108	355.621	278.394	150.625	407.209	260.349	131.117	581.673	545.099	475.478	847.463	TG(13:0/14:0/14:1(9Z))[iso6]
102.721	55.1353	53.6914	48.5112	288.132	160.968	324.058	844.11	11.1392	216.02	0	10.0219	62.9018	12.3711	24.5229	511.744	TG(13:0/20:5(5Z,8Z,11Z,14Z,17Z)/22:6(4Z,7Z,10Z,13Z,16Z,19Z))[iso6]
0.00868996	0	0	0	57.0874	34.7476	48.1614	15.4052	0	1.77332	0	0	38.0036	66.58	182.918	111.999	TG(14:0/14:1(9Z)/15:0)[iso6]
0	0	0	0	0	19.137	35.2925	1.3188	56.5265	606.194	59.6803	184.374	391.927	2.24254	17.916	1509.12	TG(14:0/16:0/17:2(9Z,12Z))[iso6]
167.743	121.546	125.006	130.644	56.0243	104.934	121.006	90.4796	208.073	206.395	121.633	85.3069	193.251	111.471	164.548	110.303	TG(14:1(9Z)/18:1(9Z)/22:6(4Z,7Z,10Z,13Z,16Z,19Z))[iso6]
130.304	186.937	184.552	111.409	169.67	358.599	310.658	263.898	134.605	385.107	241.422	117.626	698.633	636.848	733.704	276.332	TG(14:1(9Z)/20:2(11Z,14Z)/22:6(4Z,7Z,10Z,13Z,16Z,19Z))[iso6]
0	0.589032	0.996468	0.0129002	2.50465	0.846405	0.0101907	0.0317075	2.24466	0.309722	1.70963	0	3.67499	0.247742	3.24198	4.19721	TG(18:0/22:1(11Z)/22:2(13Z,16Z))[iso6]
68.0411	70.3066	55.022	72.3829	229.498	157.308	127.921	208.824	118.084	505.01	87.9334	46.159	584.462	541.732	407.595	339.391	TG(19:1(9Z)/20:5(5Z,8Z,11Z,14Z,17Z)/22:6(4Z,7Z,10Z,13Z,16Z,19Z))[iso6]
113.574	102.277	141.718	83.4568	124.844	136.808	126.041	118.118	117.689	353.014	248.338	113.572	319.139	321.998	350.033	337.787	TG(17:1(9Z)/18:0/18:2(9Z,12Z))[iso6]
228.554	202.691	205.028	169.368	213.336	322.123	286.987	273.793	252.61	609.977	265.297	191.351	728.73	749.698	780.333	813.823	TG(17:2(9Z,12Z)/18:3(9Z,12Z,15Z)/20:4(5Z,8Z,11Z,14Z))[iso6]
241.096	200.039	163.244	150.859	310.36	340.074	552.719	735.274	189.175	603.97	307.324	98.0015	710.465	792.651	964.702	839.265	TG(16:0/20:2(11Z,14Z)/20:5(5Z,8Z,11Z,14Z,17Z))[iso6]
6.35412	5.96866	4.78043	8.64937	4.57263	5.4177	4.95964	4.59141	2.1311	4.01375	2.48477	0	8.66305	0.186097	5.653	15.4387	TG(18:0/20:0/20:3(8Z,11Z,14Z))[iso6]
19.727	28.6594	22.091	22.2972	13.9525	34.2217	47.2833	42.7623	36.0774	218.809	37.9532	22.5855	185.266	216.271	252.642	228.882	TG(16:1(9Z)/20:5(5Z,8Z,11Z,14Z,17Z)/22:3(10Z,13Z,16Z))[iso6]
8.34613	15.7559	3.85914	0	5.14398	35.974	0	0	0	0	0	0	960.804	268.805	1687.54	2902.96	TG(20:4(5Z,8Z,11Z,14Z)/20:5(5Z,8Z,11Z,14Z,17Z)/21:0)[iso6]
69.0639	56.8407	82.7091	77.0285	175.879	166.569	234.139	377.665	134.446	300.159	131.657	52.964	263.046	252.829	354.222	293.11	TG(20:5(5Z,8Z,11Z,14Z,17Z)/20:5(5Z,8Z,11Z,14Z,17Z)/22:2(13Z,16Z))[iso3]
14.8296	16.0808	32.4181	0	20.4277	25.7462	34.0259	47.2724	0	64.4597	51.5302	2.45016	18.3409	75.2191	51.8901	29.4527	TG(21:0/22:0/22:1(13Z))[iso6]
13.9696	5.18097	6.96122	10.0418	5.42807	11.5381	18.122	57.2539	0	371.035	0	0	2.43111	0	0	19.2494	TG(20:2(11Z,14Z)/22:6(4Z,7Z,10Z,13Z,16Z,19Z)/22:6(4Z,7Z,10Z,13Z,16Z,19Z))[iso3]
64.3332	64.9678	75.6481	15.2824	109.585	143.638	145.036	107.522	21.3924	131.303	82.6448	0	117.997	46.3581	149.454	197.551	TG(20:5(5Z,8Z,11Z,14Z,17Z)/22:4(7Z,10Z,13Z,16Z)/22:6(4Z,7Z,10Z,13Z,16Z,19Z))[iso6]
120.269	134.486	315.527	12.9397	27.4581	72.206	36.7297	81.1202	46.8565	403.141	396.809	30.5728	344.804	345.149	315.045	1069.71	TG(22:1(13Z)/22:1(13Z)/22:6(4Z,7Z,10Z,13Z,16Z,19Z))[iso3]
34.0419	31.0472	21.5227	18.1718	19.727	27.8778	22.074	21.7358	4.2642	20.718	19.4032	4.93107	33.5223	30.0847	62.7583	56.4284	TG(22:3(10Z,13Z,16Z)/22:2(13Z,16Z)/22:6(4Z,7Z,10Z,13Z,16Z,19Z))[iso6]
18.7164	9.93136	9.48312	5.23084	6.12732	22.0431	8.53325	19.1389	8.19348	12.3384	15.438	4.00826	27.4066	25.9395	10.9709	12.2041	TG(20:2(11Z,14Z)/18:3(6Z,9Z,12Z)/20:2(11Z,14Z)) (d5)
184.04	126.046	131.728	141.028	677.632	294.845	647.429	2079.3	139.02	744.458	73.9736	59.8557	432.379	301.305	283.221	662.361	DG(12:0/12:0/0:0)[iso2]
88.7625	100.62	82.4139	89.9532	64.7887	105.751	94.271	101.995	78.1712	76.3594	82.553	88.1519	66.3869	42.0789	77.4182	71.1474	DG(18:4(6Z,9Z,12Z,15Z)/18:4(6Z,9Z,12Z,15Z)/0:0)
1443.27	1558.76	3659.59	829.907	3836.42	2156.46	2479.87	1673.12	21.1507	38.5662	1021.4	7.3649	353.625	188.41	32.7573	24.1253	DG(12:0/20:1(11Z)/0:0)[iso2]
3.05481	2.91817	3.87613	3.01153	5.87114	8.69121	4.03266	0	6.29436	24.9227	6.54178	0	8.31141	10.9368	34.4958	24.9321	DG(12:0/20:5(5Z,8Z,11Z,14Z,17Z)/0:0)[iso2]
0	0	0	0	0	0	0	0	527.18	300.872	0	26.564	286.733	0	10.2856	16.7338	DG(12:0/21:0/0:0)[iso2]
1798.12	2162.94	2585.09	2213.11	1929.77	1826.28	1199.87	1513.68	6436.8	2652.69	2747.89	5161.58	3024.92	2860.85	1590.72	1540.74	DG(12:0/22:2(13Z,16Z)/0:0)[iso2]
15972.1	18966	22920	15373.6	14825.2	13317.5	10503.5	12770.7	6126.62	5377.19	24950.5	7853.87	2280.29	4807.81	4364.48	3944.36	DG(12:0/22:3(10Z,13Z,16Z)/0:0)[iso2]
0	0	0	0	0	0	0	0	0	0.635662	0	0	169.218	62.6386	25.2772	14.2001	DG(12:0/22:5(7Z,10Z,13Z,16Z,19Z)/0:0)[iso2]
43.6313	39.9847	53.8192	16.9046	29.5006	24.1587	11.7246	27.0185	39.6092	30.6967	56.5857	52.5072	0	0	22.9776	15.964	DG(13:0/20:4(5Z,8Z,11Z,14Z)/0:0)[iso2]
141.697	166.103	199.837	173.127	152.014	119.512	84.4687	129.336	0	6.6187	128.672	0	21.3473	10.9767	13.2945	4.43617	DG(14:0/16:0/0:0)[iso2]
37.9509	31.7763	44.1644	9.54475	26.6732	4.26961	6.28723	17.4534	11.9403	38.3688	22.5116	0	121.837	49.5246	44.7751	28.9521	DG(14:0/18:1(9Z)/0:0)[iso2]
1240.22	1167.54	1203.47	1027.4	121.245	33.7912	0	0	8.52606	516.777	69.2917	1519.82	504.088	931.627	4.56494	110.552	DG(14:0/20:3(8Z,11Z,14Z)/0:0)[iso2]
66.4752	116.737	147.004	73.7173	151.649	189.901	140.629	218.344	129.751	407.775	355.433	202.183	390.603	217.456	398.016	419.051	DG(14:1(9Z)/17:0/0:0)[iso2]
9.90448	38.1756	21.973	19.4763	2.06989	1.47977	0	1.44264	0	70.6111	3112.57	0	23.8684	559.133	937.047	59.2459	DG(14:1(9Z)/20:0/0:0)[iso2]
4099.4	7151.1	8453.66	4729.91	3445.68	2331.75	1656.7	2159.15	0	0	0	0	7.8714	0	31.7353	5.39266	DG(14:1(9Z)/20:2(11Z,14Z)/0:0)[iso2]
2712.81	2976.32	3501.78	3002.13	2747.56	2883.68	2432.9	3029.65	490.48	391.635	945.497	865.883	106.764	184.826	35.5374	216.065	DG(14:1(9Z)/22:2(13Z,16Z)/0:0)[iso2]
165176	191969	207032	155304	138473	110021	98288.4	107685	166284	119743	189534	213002	8624.34	10142.6	33317.6	37465.5	DG(14:1(9Z)/22:5(7Z,10Z,13Z,16Z,19Z)/0:0)[iso2]
52.5667	48.6919	80.4083	53.4189	51.3468	114.459	85.9344	51.7484	110.088	330.548	134.779	26.8585	108.4	59.5114	1.20802	6.1288	DG(15:0/19:0/0:0)[iso2]
1692.13	1783.43	1659.22	1694.03	1276.61	1124.83	1043.5	1159.46	1464.59	884.856	1475.41	1578.98	285.261	410.455	383.252	461.594	DG(15:1(9Z)/18:3(9Z,12Z,15Z)/0:0)[iso2]
7.34806	2.95676	3.92457	5.07559	2.59443	1.53662	0	12.5238	0	0	0	0	5.91697	0	15.0108	31.3423	DG(15:1(9Z)/22:4(7Z,10Z,13Z,16Z)/0:0)[iso2]
14.6395	21.1772	27.8323	16.0824	27.4528	20.3846	17.5789	23.9481	18.5648	23.2923	21.5076	20.0418	595.674	455.416	449.181	615.471	DG(18:3(6Z,9Z,12Z)/16:1(9Z)/0:0)[iso2]
13.7781	14.7008	3.46855	17.6143	1.61093	18.9588	24.586	12.8564	132.967	640.833	489.545	0	146.007	147.322	351.009	191.113	DG(18:3(6Z,9Z,12Z)/17:1(9Z)/0:0)[iso2]
0	0	0	0	0	0	251.256	48.5632	0	0	0	0	3.38234	0	0	0	DG(18:3(6Z,9Z,12Z)/20:5(5Z,8Z,11Z,14Z,17Z)/0:0)[iso2]
641.982	244.417	311.995	457.681	418.562	244.536	190.232	409.054	515.359	198.658	217.007	465.85	111.5	61.5934	119.046	102.975	DG(18:4(6Z,9Z,12Z,15Z)/16:0/0:0)[iso2]
328.215	130.217	183.249	238.019	190.147	140.412	102.004	179.577	238.815	119.779	105.366	230.441	57.6818	35.4072	67.7406	44.6102	DG(18:4(6Z,9Z,12Z,15Z)/16:1(9Z)/0:0)[iso2]
61.3489	4.27402	0	0	0	0	0	0	11.2783	0	0	0	2.09687	202.019	0	147.215	DG(18:4(6Z,9Z,12Z,15Z)/18:0/0:0)[iso2]
12785.3	16803.2	17582.6	12311.3	12424.6	8594.6	6418.49	16125.5	1760.51	729.894	25381	1169.13	568.354	1111.21	914.63	590.287	DG(18:4(6Z,9Z,12Z,15Z)/18:1(9Z)/0:0)[iso2]
0	4.64801	0	0	76.5017	30.3647	42.9904	9.03545	6.00373	108.906	38.7529	9.69448	4236.26	3462.54	3199.75	4895.48	DG(19:1(9Z)/20:4(5Z,8Z,11Z,14Z)/0:0)[iso2]
0	0	0	0	0	0	0	0	0	0	0	0	809.379	410.668	654.436	931.043	DG(19:1(9Z)/20:5(5Z,8Z,11Z,14Z,17Z)/0:0)[iso2]
2291.01	2980.75	4257.58	2765.19	5885.82	6091.28	4586.86	5673.5	3740	3499.07	5554.48	4320.73	2286.56	4903.43	3713.39	4482.57	DG(17:1(9Z)/17:2(9Z,12Z)/0:0)[iso2]
153.27	120.574	146.693	138.668	70.1146	160.274	120.231	75.7654	230.843	813.832	463.163	57.6722	560.231	638.682	687.291	489.231	DG(17:1(9Z)/19:0/0:0)[iso2]
2451.77	2779.12	2849.48	2377.97	1027.32	696.138	323.717	1001.41	0	0.0340618	0	0	0.0732064	0	15.1943	0	DG(16:0/20:4(5Z,8Z,11Z,14Z)/0:0)[iso2]
1.37608	1.17256	3.8113	0	0	0	0	0	3281.4	5659.38	13087.8	9161.95	2632.96	1433.97	235.136	4378.98	DG(18:3(9Z,12Z,15Z)/18:3(9Z,12Z,15Z)/0:0)
24.4697	22.6761	21.3234	27.8243	17.5511	27.2897	20.1925	21.2737	43.579	101.276	37.4566	80.9482	157.722	67.178	57.213	6.38658	DG(18:0/20:1(11Z)/0:0)[iso2]
13.4243	20.0654	22.072	9.81511	18.7118	42.9917	31.0042	21.3128	3.16371	50.635	32.1436	6.42924	49.092	33.6502	64.1878	66.6345	DG(18:3(9Z,12Z,15Z)/19:0/0:0)[iso2]
0	0	0	0	0	0	0	0	2071.06	1346.47	2048.64	2295.38	1553.39	1642.84	1429.95	1574.66	DG(16:1(9Z)/21:0/0:0)[iso2]
7.07756	7.17702	10.2138	3.00551	24.6056	17.4824	23.1234	6.33471	2.33871	16.1772	11.5114	12.3309	14.3431	47.5635	40.6464	25.2315	DG(18:3(9Z,12Z,15Z)/20:0/0:0)[iso2]
396.959	448.353	272.469	362.705	272.69	360.624	230.197	91.426	0	189.035	0	0	1172.98	928.05	1815.59	2124.49	DG(17:1(9Z)/21:0/0:0)[iso2]
0	2.86111	5.31546	0	8.7774	5.26279	61.1712	7.42929	0	67.8391	0	0	767.052	350.144	829.204	1136.6	DG(19:0/20:4(5Z,8Z,11Z,14Z)/0:0)[iso2]
11.2018	42.8796	23.7162	22.62	12.2362	63.6572	0	0	27.654	158.343	69.7689	39.1865	140.16	0	0	93.6347	DG(20:0/20:5(5Z,8Z,11Z,14Z,17Z)/0:0)[iso2]
13.1657	7.73089	13.4403	15.8185	16.2824	21.591	39.4301	10.9416	38.0503	52.8884	24.1372	19.179	377.492	390.1	144.573	307.138	DG(20:1(11Z)/22:0/0:0)[iso2]
0	0	0	0	0	0	0.987306	0	0	69.6209	0	0	57.0829	16.1171	156.582	140.216	DG(18:1(9Z)/22:6(4Z,7Z,10Z,13Z,16Z,19Z)/0:0)[iso2]
0.000929187	0.0084042	0.0673681	0	0	0.143133	0	0	0.0688653	0	0	0	1687.76	813.868	743.37	1197.63	DG(20:0/22:4(7Z,10Z,13Z,16Z)/0:0)[iso2]
0	8.70315	0	0	78.9042	15.6832	0	38.4074	0	111.038	0	482.626	229.184	65.319	39.2364	0	DG(21:0/21:0/0:0)
0	0	0	0	0	0	0	0.0096901	0.0173612	0.120296	0.0430549	0.165365	1110.48	533.535	516.234	882.849	DG(20:2(11Z,14Z)/22:2(13Z,16Z)/0:0)[iso2]
14.9957	15.6839	51.2062	16.4194	24.4532	44.5955	60.3929	105.329	46.8373	683.475	45.2106	97.1674	95.7931	110.849	740.261	360.752	DG(22:0/22:3(10Z,13Z,16Z)/0:0)[iso2]
9.56262	14.3035	8.86441	0	9.22335	20.6935	10.7893	13.8449	8.41831	22.8007	40.5184	20.9606	23.268	13.152	62.1417	38.4626	DG(21:0/22:2(13Z,16Z)/0:0)[iso2]
0	0	0	0	0	0	0	0	0	135.299	0	0	1244.71	339.645	289.319	1632.2	DG(22:0/22:5(7Z,10Z,13Z,16Z,19Z)/0:0)[iso2]
0	0	0	0	0	0	0	0	0	0.995283	0	0	1436.86	454.249	163.182	1312.28	DG(22:2(13Z,16Z)/22:5(7Z,10Z,13Z,16Z,19Z)/0:0)[iso2]
1.95852	9.58341	4.29822	9.77395	1.43091	0	5.75525	5.22339	0	2.69011	2.86727	27.212	27.5699	0	36.0301	10.1345	DG(14:0/0:0/14:0) (d5)
288.188	310.655	261.38	342.843	255.963	175.516	145.12	216.382	149.873	42.5067	112.715	86.1657	31.354	53.2548	48.9578	54.2638	DG(15:0/0:0/15:0) (d5)
93.8637	106.115	193.131	164.48	99.4453	124.533	64.29	107.976	131.2	19.1617	79.1964	2.90952	35.5477	5.76692	10.5243	4.96179	DG(19:0/0:0/19:0) (d5)
2067.89	2662.96	2800.6	2995.02	1795.97	1306.48	942.057	1399.03	0	0	0	0	0	0	0	0	DG(18:0/16:0/0:0)
4254.17	5515.17	6477.56	5077.28	2601.17	2354.76	1418.31	2226.65	303.296	233.51	375.784	180.856	230.083	71.4963	391.507	204.747	DG(18:1(11E)/16:0/0:0)
3.93172	6.80401	3.69567	3.97563	7.58304	6.16848	6.04734	9.43663	13.0594	3.47304	11.8075	2.19924	4.85602	5.86592	3.99176	3.37794	DG(20:0/18:0)
454.311	497.395	727.785	472.76	591.325	369.068	387.407	408.882	53307.8	25062.1	47201.1	44574.2	10801.3	5206.73	10516.2	10808.3	DG(P-14:0/18:1(9Z))
11424.2	226.107	12520.8	7311.3	7175.08	5479.92	4852.97	4887.5	6374.39	4412.82	10266	9223.2	376.062	530.86	588.093	676.169	MGDG(20:5(5Z,8Z,11Z,14Z,17Z)/18:3(9Z,12Z,15Z))
23.9797	52.8499	51.6351	72.1793	37.8915	239.284	149.466	83.6186	56.0492	183.215	127.733	121.504	380.415	800.084	400.127	537.179	MGDG(18:3(9Z,12Z,15Z)/18:4(6Z,9Z,12Z,15Z))
2678.65	5152.7	2859.6	1980.9	1537.81	1377.43	1627.76	1738.95	3107.58	1660.65	2623.86	2942.42	744.59	1189.37	660.358	648.168	MGDG(18:3(9Z,12Z,15Z)/16:3(7Z,10Z,13Z))
3578.65	0	3171.73	2343.68	1464.43	942.264	713.708	932.529	2655.3	730.32	2827.12	3618.03	71.8239	82.4275	115.278	106.556	MGDG(18:2(9Z,12Z)/18:2(9Z,12Z))
0	2.26464	1.56183	0	0	0	0	0	12.6393	0	3.60685	3.08307	0.00313832	0	0.000689416	0	MGDG(18:3(9Z,12Z,15Z)/18:3(9Z,12Z,15Z))
218.993	0	244.93	210.802	148.775	327.858	268.991	207.549	238.248	495.157	518.619	342.704	931.413	1206.41	726.131	890.632	Clerosterol
8943.52	9691.77	9608.44	8329.91	3071.62	1536.52	940.727	3107.55	191.448	190.554	90.1974	54.7304	240.198	137.38	18.6608	379.298	16:1-Glc-Cholesterol
2.45602	13.3623	24.4125	0	6.07699	0	129.825	14.5562	49752.3	24099.5	759.09	66890.6	4093.23	6355.5	12391.1	15262.4	16:2-Glc-Cholesterol
56819.7	62729.2	55404.9	68581	48855.1	52139.7	43682.8	47714.7	64315.8	32656	51389.7	65762.9	13958.7	25048.1	21623.3	24058.8	16:3-Glc-Cholesterol
0	20.6931	0	0	120.729	23.7717	0	49.9423	0	131.3	0	574.679	309.867	108.283	36.083	0	20:0 Campesteryl ester
7.21592	4.53408	4.59939	6.18834	56.6892	12.1467	70.4054	70.2104	4.31899	60.2048	1.38796	9.4827	150.204	112.263	142.204	208.418	16:0 Sitosteryl ester
372.305	447.124	439.999	418.738	484.603	495.734	468.903	482.52	365.889	433.725	484.658	18.8767	462.221	639.239	645.049	780.115	16:0 Stigmasteryl ester
0	0	0	0	0	0	1.31217	0	0	0	0	0	0	335.516	1353.88	2166.84	16:2 Sitosteryl ester
1.20476	0	0	0	0	14.2011	4.91093	1.52393	3.20848	126.896	39.4443	0	398.538	128.843	499.513	455.4	16:3 Stigmasteryl ester
270.645	336.686	320.798	298.569	326.154	430.765	382.638	414.514	231.278	397.257	431.626	99.7941	540.669	622.527	653.674	822.026	18:1 Campesteryl ester
4.49491	7.42243	5.81596	1.61585	0	21.9491	5.61112	6.07703	2.66275	52.6234	40.8296	4.31744	89.8295	20.1403	95.0346	135.147	20:1 Campesteryl ester
144.821	199.681	208.857	155.839	370.221	211.095	349.082	380.25	240.867	382.84	464.24	119.598	257.889	142.893	719.655	1102.76	22:2 Campesteryl ester
0	0	362.754	269.62	271.494	244.551	236.192	289.392	232.111	228.719	293.072	367.781	239.231	517.944	269.699	355.084	Campesteryl glucoside
0.17669	6.16814	6.3975	5.58021	0.622069	14.3954	10.5919	2.5596	6.54007	5.81651	11.324	13.7465	302.85	8.06642	15.3796	16.0581	18:0-Glc-Campesterol
35.9037	36.3365	39.925	41.6394	15.9701	36.3124	27.0769	28.1154	32.1389	39.9381	12.243	60.3572	122.684	31.502	21.5867	9.18764	18:3-Glc-Campesterol
35.3691	58.5902	64.4474	33.2834	64.3176	45.3782	37.6998	44.0699	5.14886	14.8117	34.1133	43.7485	70.8838	33.0599	42.0041	49.4028	Stigmasteryl glucoside
0	0	0	0	0	0	0	0	0	0	0	0	268.195	64.8252	11.1149	4.2062	Stigmastanyl glucoside
6.21578	4.90602	1.84932	2.11324	1.13619	5.16686	7.53685	14.5578	0	14.5614	7.27628	2.71387	5.63741	6.91013	9.1889	14.9179	22:0-Glc-Stigmasterol
1831.64	1569.98	1610.86	1506.46	10572.5	8649.37	17931.3	16822.9	1934.62	7592.98	2328.07	3333.96	6864.3	27830.2	10132.8	9079.72	22:1-Glc-Sitosterol
1460.8	1024.1	1100.64	884.439	13057.2	11093.8	27645.8	24117.1	1441.85	10205	2191.03	2866.71	9825.2	32793.8	14615.5	12495	22:2-Glc-Sitosterol
0	2.47955	0	0.0948739	0	28.6506	59.7987	8.45593	7.84	0	0.0491849	0.0240719	4.42117	13.6155	30.2654	65.0973	18:1-Glc-Stigmasterol
110.385	89.8619	112.388	44.1634	43.3513	128.94	119.239	67.5806	61.6947	68.3566	35.7731	6.94501	129.769	63.4251	38.4253	95.7041	20:2-Glc-Stigmasterol
0	0	0	0	0	0	0	7.83562	0	0	0	0	0	0	0	0	20:3-Glc-Stigmasterol
130.96	133.158	109.474	190.258	292.804	293.971	356.127	290.346	123.144	351.861	160.686	97.634	276.497	496.267	381.89	352.244	22:2-Glc-Stigmasterol
273.486	310.247	329.677	275.946	224.987	348.862	269.567	321.919	248.271	400.298	446.929	356.498	612.708	563.597	760.772	836.693	20:1 Cholesteryl ester
224.194	189.126	193.043	196.548	434.2	550.904	625.583	552.212	295.551	731.367	506.664	172.249	969.197	1101.83	826.143	1602.26	20:4 Cholesteryl ester
137.468	144.155	163.906	106.628	89.109	306.598	15.1708	9.50954	223.982	827.495	548.075	402.564	869.806	228.972	85.0907	401.237	12:0 Cholesteryl ester
61.0232	54.1145	86.5527	75.7968	34.9995	51.4371	28.097	53.6649	156.663	5.67098	5.32388	18.3948	11.6734	2.20581	3.77859	3.52059	15:0 Cholesteryl ester
875.381	1029.51	1230.03	781.901	725.945	547.751	480.043	537.554	777.33	642.729	1048.33	1050.55	175.277	58.5708	173.294	192.678	cholesteryl beta-D-glucoside
346.633	467.883	0	0	108.618	249.865	181.226	4.89828	0	490.77	0	0	0	17.1917	113.361	0	22:5 Cholesteryl ester
196.318	204.894	201.025	120.974	189.828	126.788	122.607	164.887	293.968	224.295	322.194	397.39	172.457	183.704	202.027	210.986	Cholesteryl-alpha-D-glucoside
64.6991	44.0901	67.9262	26.9463	32.9475	0	4.14046	19.2231	0	0	0	0	0	0	0	0	Cer(d18:1/23:0)
0	0	0	0	0	0	0	0	0	0	0	0	418.674	244.462	278.403	481.606	Cer(d18:2/20:1)
11.212	11.2556	0	15.5327	97.248	55.2048	113.786	287.419	14.8942	102.536	0	5.29849	33.1079	20.3768	18.4155	114.559	LacCer(d18:1/18:1(9Z))
532.218	625.144	571.974	634.512	594.883	806.742	704.003	892.105	221.795	271.896	4.57789	7.00033	67.4507	30.6735	11.0257	189.333	LacCer(d18:0/16:0)
9.98076	0	2.40225	0	170.299	162.439	349.863	736.8	0	0	0	0	0	0	0	0	LacCer(d18:0/18:1)
75.0454	256.2	185.741	379.714	47.9029	56.2786	19.9406	92.7034	96.1559	35.0413	90.8358	186.866	479.954	14.2767	19.0423	28.4324	Cer(d15:1/22:0)
0	0	0	0	0	0	0	0	0	5.75814	0	0	1549.67	351.057	193.002	125.843	Cer(d16:1/20:0)
0	7.06118	2.18392	2.75068	0	6.7611	0	1.07974	0	0	10.7829	0	19.2267	0	0	0	Cer(d14:2(4E,6E)/20:1(11Z))
1.34002	9.07342	9.78614	3.12876	126.15	123.413	86.7872	99.1737	0	183.059	266.476	488.64	205.264	493.782	595.708	505.289	Cer(d16:2(4E,6E)/24:0(2OH))
0	0	0	21.2819	63.9535	5.92127	0	31.2237	0	87.485	180.739	171.919	14.8852	0	0	0	Cer(d18:0/17:0)
5.6758	1.89144	73.0243	3.15314	65.667	5.50512	7.60984	5.20403	3.95855	73.4991	66.9643	0	142.425	127.052	150.641	328	Cer(d20:0/22:0)
384.469	398.053	218.893	335.683	204.009	267.378	205.306	118.753	80.0604	147.56	8.93526	116.517	70.8919	2.40482	6.92913	1.56284	Cer(t20:0/22:0(2OH))
441.149	438.968	373.244	431.384	524.154	676.22	667.107	725.834	606.939	954.014	793.636	692.994	1077.4	1007.91	1444.6	1639.27	GlcCer(d15:1/18:0)
0	0	0	0	0	0	2.689	9.59143	0	0	0	0	488.14	340.46	11.2977	0	GlcCer(d14:2(4E,6E)/18:1(9Z))
315.475	357.458	304.561	461.742	448.303	248.275	318.021	330.503	197.386	345.456	447.123	709.04	316.268	354.131	239.785	225.509	GlcCer(d15:2(4E,6E)/18:0)
0	1.76	3.82888	0	0.715924	0.64553	0	0	476.642	403.48	623.485	739.575	5599.7	1896.29	669.816	727.891	GlcCer(d15:2(4E,6E)/22:0)
12.4334	37.6017	51.8885	24.9343	7.93029	2.27334	0	4.91588	0	0	37.8982	0	0.991548	0	0	0	GlcCer(d14:1(4E)/20:0(2OH))
